# Anti-angiogenic treatment strategies for the therapy of endometriosis

M.W. Laschke\* and M.D. Menger

Institute for Clinical & Experimental Surgery, University of Saarland, D-66421 Homburg/Saar, Germany

Correspondence address. Tel: +49-6841-162-6554; Fax: +49-6841-162-6553; E-mail: matthias.laschke@uks.eu

Submitted on February 14, 2012; resubmitted on May 2, 2012; accepted on May 17, 2012

---

## TABLE OF CONTENTS

---

- Introduction
  - Methods
  - Results
    - Growth factor inhibitors
    - Endogenous angiogenesis inhibitors
    - Fumagillin analogues
    - Statins
    - Cyclo-oxygenase (COX)-2 inhibitors
    - Phytochemical compounds
    - Immunomodulators
    - Dopamine agonists
    - Peroxisome proliferator-activated receptor (PPAR) agonists
    - Progestins, danazol and gonadotropin-releasing hormone (GnRH) agonists
    - Other agents
  - Potential impact of anti-angiogenic treatment in future endometriosis therapy
  - Conclusions
- 

**BACKGROUND:** Angiogenesis, i.e. the development of new blood vessels from pre-existing ones, represents an integral part in the pathogenesis of endometriosis. During the last decade, an increasing number of studies have therefore focused on the anti-angiogenic treatment of the disease. The present review provides a systematic overview of these studies and critically discusses the future role of anti-angiogenic therapy in the multimodal management of endometriosis.

**METHODS:** Literature searches were performed in PubMed, MEDLINE and ISI Web of Knowledge for original articles published before the end of March 2012, written in the English language and focusing on anti-angiogenic approaches for the therapy of endometriosis. The searches included both animal and human studies.

**RESULTS:** Numerous compounds of different substance groups have been shown to exert anti-angiogenic effects on endometriotic lesions under experimental *in vitro* and *in vivo* conditions. These include growth factor inhibitors, endogenous angiogenesis inhibitors, fumagillin analogues, statins, cyclo-oxygenase-2 inhibitors, phytochemical compounds, immunomodulators, dopamine agonists, peroxisome proliferator-activated receptor agonists, progestins, danazol and gonadotropin-releasing hormone (GnRH) agonists. However, clinical evidence for their efficacy in anti-angiogenic endometriosis therapy is still lacking.

**CONCLUSIONS:** Anti-angiogenic compounds hold great promise for the future treatment of endometriosis because they may inhibit the establishment of new endometriotic lesions in early stages of the disease or after surgical treatment. Further experimental studies, controlled clinical trials in particular, are required now to clarify which compounds fulfil these expectations without inducing severe side effects in patients with endometriosis.

**Key words:** endometriosis / angiogenesis / vascularization / anti-angiogenic therapy / vascular endothelial growth factor

## Introduction

Endometriosis is a benign gynaecological disease, which is characterized by the presence of endometriotic lesions consisting of functional endometrial glands and stroma outside the uterine cavity (Galle, 1989). The prevalence rate of the condition is high among women of reproductive age, causing significant annual costs in the healthcare system (Simoens *et al.*, 2007). Although some affected women may remain asymptomatic, endometriosis is typically associated with a wide spectrum of pain symptoms (Stratton and Berkley, 2011) and infertility (Garrido *et al.*, 2002; Bulletti *et al.*, 2010). This often leads to a severely limited quality of the patients' private and professional life (Gilmour *et al.*, 2008).

Current approaches for the treatment of endometriosis involve pharmacological therapy and surgical removal of endometriotic lesions. Because the proliferation and long-term survival of ectopic endometrial tissue is estrogen-dependent (Giudice and Kao, 2004), classical pharmacological therapies are primarily aimed at the suppression of endogenous estrogen production by the application of oral contraceptives, GnRH agonists, androgenic agents or aromatase inhibitors (Nothnick, 2010). However, this type of medication is associated with substantial side effects, which limits prolonged exposure, and endometriosis is likely to recur following treatment cessation (Fedele *et al.*, 1994; van Langendonck *et al.*, 2008; Pullen *et al.*, 2011). Surgical removal of endometriotic lesions is not only temporarily effective, but also associated with a high recurrence rate (Fedele *et al.*, 1994; Guo, 2009). In addition, dependent on the localization of the lesion and the severity of the disease, surgical removal can be technically challenging and bears the risk of urological or colorectal complications. Thus, there is an urgent need for the development of novel treatment strategies for endometriosis, which guarantee the

long-term cure of affected patients. For this purpose, key processes in the pathogenesis of endometriosis have been identified, which may serve as potential therapeutic targets.

One of these key processes is angiogenesis, i.e. the development of new blood vessels from the pre-existing ones (Carmeliet and Jain, 2011). In fact, similar to tumours and their metastases, survival of endometriotic lesions is crucially dependent on the establishment of an adequate blood supply (Groothuis *et al.*, 2005; Becker and D'Amato, 2007; May and Becker, 2008; Taylor *et al.*, 2009). Accordingly, early developing lesions, which are the most active ones, have a typically pink-red appearance because of their high vascular density (McLaren, 2000; Laschke *et al.*, 2011a; Fig. 1) and exhibit an increased number of immature pericyte-free microvessels when compared with the black lesions of later stages (Nisolle *et al.*, 1993; Matsuzaki *et al.*, 2001). Moreover, the peritoneal fluid from patients with endometriosis contains high amounts of various angiogenic growth factors and reduced concentrations of anti-angiogenic compounds (Laschke and Menger, 2007). Finally, the eutopic endometrium from patients with endometriosis has been shown to exhibit an increased angiogenic potential when compared with healthy women (Chung *et al.*, 2002; Hur *et al.*, 2006). This may contribute to the initiation of the disease by retrograde menstruation of highly angiogenic endometrial fragments into the peritoneal cavity. Based on these findings, endometriosis has been classified as a typical angiogenic disease, such as cancer, psoriasis or diabetic retinopathy (Healy *et al.*, 1998).

Since Judah Folkman's revolutionary idea of fighting cancer by attacking its blood supply (Folkman, 1996, 1971), anti-angiogenic therapy has been proposed as a promising strategy for several angiogenic diseases, including endometriosis. During the last decade, an increasing number of studies have focused on the treatment of endometriotic lesions by application of different anti-angiogenic compounds. In the present review, we provide a systematic overview of these studies and highlight the most interesting anti-angiogenic

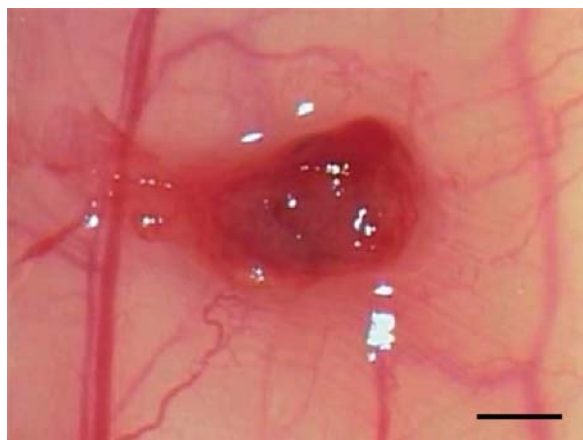

**Figure 1** Typical macroscopic appearance of a developing endometriotic lesion, which was surgically induced under experimental conditions by suturing a mouse uterine tissue sample to the peritoneal wall of a recipient animal, according to Laschke *et al.* (2011a). Note the red colour of the lesion, which is caused by its high microvascular density and haemorrhages occurring during the early vascularization process. Scale bar: 1.6 mm.

**Table I** Inclusion and exclusion criteria for studies of anti-angiogenic treatment strategies in endometriosis in the present review, as listed in Table II.

| Inclusion criteria                                                                                         | Exclusion criteria                                                                                        |
|------------------------------------------------------------------------------------------------------------|-----------------------------------------------------------------------------------------------------------|
| Original articles                                                                                          | Editorials, letters to the editor, abstracts, duplicate papers, reviews, case reports                     |
| English language                                                                                           | Language other than English                                                                               |
| All electronically listed publications in PubMed, MEDLINE and ISI Web of Knowledge until end of March 2012 | Publications listed after March 2012                                                                      |
| Studies focusing on anti-angiogenic effects of compounds on endometriosis                                  | Studies focusing on basic mechanisms of angiogenesis in the eutopic endometrium                           |
| Animal and human studies, <i>in vitro</i> and <i>in vivo</i>                                               | Studies analysing angiogenesis in endometriosis independent from application of anti-angiogenic compounds |

approaches. Moreover, we critically discuss the potential future role of anti-angiogenic therapy in the multimodal management of endometriosis.

## Methods

Literature searches were performed in PubMed, MEDLINE and ISI Web of Knowledge for original articles written in the English language and electronically listed until end of March 2012, which focused on anti-angiogenic treatment strategies for the therapy of endometriosis. The searches included the key words 'endometriosis', 'endometriotic', 'endometrium', 'endometrial' and 'ectopic endometrium', which were paired with the key words 'angiogenesis', 'vascularization' and 'anti-angiogenic'. The searches included both animal and human studies. Inclusion and exclusion criteria for the studies selected are shown in Table I.

## Results

We detected 49 original articles fulfilling the inclusion criteria of our literature search (Fig. 2, Table II). Almost all of these articles reported experimental studies, which were performed in different *in vitro* and *in vivo* endometriosis models. The application and suitability of these models for the analysis of angiogenesis in endometriosis has previously been reviewed in detail (Laschke and Menger, 2007). In general, we found that the studies comprised many anti-angiogenic compounds, which were not restricted to one specific substance group. The anti-angiogenic properties of most of these compounds had already been demonstrated in tumour studies before they were analysed in the context of endometriosis. Table III provides an overview of their specific targets or mechanisms of action and a selection of relevant side effects reported in experimental and clinical studies.

### Growth factor inhibitors

During the last years, several angiogenic growth factors have been identified, which are expressed in endometriotic lesions and released into the peritoneal fluid of patients with endometriosis (Taylor et al., 2002). The most prominent and the most studied one is vascular endothelial growth factor (VEGF), which acts as a potent selective endothelial mitogen and survival factor (Leung et al., 1989; Lazarus and Keshet, 2011). Of interest, highly active red endometriotic lesions contain the highest VEGF concentrations when compared with other lesion types (Donnez et al., 1998). In addition, peritoneal fluid concentrations of VEGF correlate significantly with the stage of endometriosis (Shifren et al., 1996).

VEGF is a dimeric glycoprotein, whose biological effects are primarily mediated by two high-affinity receptor tyrosine kinases on the surface of microvascular endothelial cells, i.e. VEGFR-1 (Flt-1) and VEGFR-2 (Flk-1/KDR) (de Vries et al., 1992; Millauer et al., 1993). Hull et al. (2003) were the first to report that treatment with both a soluble truncated Flt-1-receptor and an affinity-purified VEGF-antibody significantly inhibits the growth of developing endometriotic lesions in nude mice by disrupting their immature microvasculature. Similar results were found by Nap et al. (2004; 2005) who treated endometriotic lesions with an anti-VEGF antibody in the nude mouse model and the chicken chorioallantoic membrane (CAM) assay. These findings indicate that blockade of VEGF signalling prevents the establishment of endometriotic lesions. In the future, this

may be achieved by VEGF-targeted gene therapy (Rein et al., 2010). However, VEGF targeting is currently much easier to realize in clinical practice by the application of an anti-VEGF antibody, such as bevacizumab (Avastin). Bevacizumab is a recombinant anti-VEGF monoclonal antibody, which is already approved by the US Food and Drug Administration (FDA) as a first-line treatment for patients suffering from metastatic colorectal cancer in combination with chemotherapy (Ferrara et al., 2005). Recently, Ricci et al. (2011) demonstrated that treatment with this antibody significantly diminishes vascular density and cell proliferation and increases apoptotic cell death in surgically induced endometriotic lesions of BALB/c mice. Moreover, bevacizumab reduces VEGF levels in the peritoneal fluid of the animals. Nonetheless, despite these promising experimental findings it is unlikely that bevacizumab will ever be approved for endometriosis therapy, because this may be accompanied by severe side effects, such as hypertension, proteinuria, impaired wound healing, gastrointestinal perforation, thrombosis and bleeding (Kamba and McDonald, 2007).

The most potent stimulus for the up-regulation of VEGF is hypoxia (Shweiki et al., 1992), which prevents the intracellular degradation of ubiquitously expressed hypoxia-inducible factor-1 $\alpha$  (HIF-1 $\alpha$ ; Harris, 2002). Under hypoxic conditions, this factor translocates into the nucleus, heterodimerizes with HIF-1 $\beta$ /aryl hydrocarbon nuclear receptor translocator and binds to the hypoxia-responsive elements (HRE) on the gene encoding VEGF (Harris, 2002). Accordingly, Sharkey et al. (2000) showed that VEGF secretion from hypoxia-exposed endometrial stromal and glandular cell cultures markedly increases when compared with normoxic cell cultures. Becker et al. (2008) reported that targeting the hypoxia mechanism represents another option to block VEGF signalling in endometriosis. In fact, they found that HIF-1 $\alpha$  is up-regulated in surgically induced peritoneal and mesenteric endometriotic lesions in mice, promoting the increased expression of VEGF. Treatment with 2-methoxyestradiol, an anti-angiogenic agent currently being tested in phase II trials for cancer (Kulke et al., 2011), dose-dependently inhibits this process and suppresses lesion growth. Of interest, 2-methoxyestradiol has minimal toxicities even upon administration of high doses (Dahut et al., 2006). However, owing to its extensive first pass metabolism and low solubility, subtherapeutic plasma concentrations of 2-methoxyestradiol have been observed despite large orally administered doses (Verenich and Gerk, 2010). First, these major pharmacokinetic problems have to be solved before 2-methoxyestradiol can successfully be launched into the market.

In light of the fact that endometriotic lesions not only express VEGF but also various other growth factors, it is obvious that the development of new blood vessels in endometriotic lesions is crucially dependent on the interaction of multiple signalling pathways (Fig. 3). To address this point, the effect of combined growth factor inhibition on the vascularization of endometriotic lesions was analysed in the dorsal skinfold chamber of Syrian golden hamsters (Laschke et al., 2006a). This model allows for the detailed analysis of angiogenesis and microvascular network morphology in endometriotic lesions by means of intravital fluorescence microscopy (Laschke et al., 2005). Endometriotic lesions were treated with the small molecule tyrosine kinase inhibitor SU5416, which solely suppresses the activity of VEGF receptor tyrosine kinase (Mendel et al., 2000), or SU6668, which is a multipotent inhibitor of the tyrosine kinase activity of VEGF, basic fibroblast growth factor (bFGF) and platelet-derived

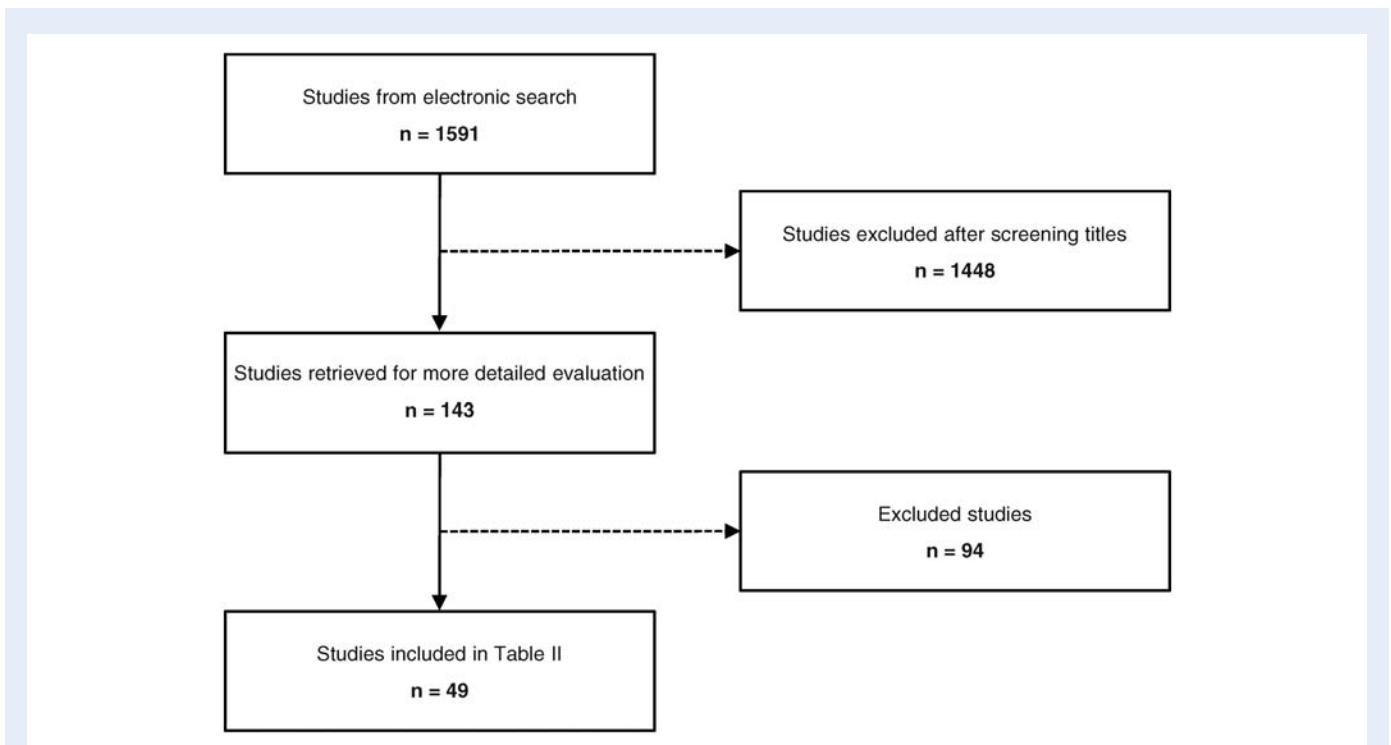

**Figure 2** Flow diagram depicting selection of articles for review of studies focusing on the anti-angiogenic effect of different compounds on endometriosis, as listed in Table II.

growth factor receptors (Hoekman, 2001). Of interest, the combined inhibition of all three growth factors was much more effective in suppressing lesion vascularization and growth than blockade of VEGF alone (Laschke *et al.*, 2006a). These findings indicate that anti-angiogenic compounds, which target simultaneously different growth factor signalling pathways, may be highly effective in the future anti-angiogenic therapy of endometriosis.

### Endogenous angiogenesis inhibitors

Endogenous inhibitors of angiogenesis are proteins or fragments of proteins, which are formed in the body and have been shown to inhibit the development of new blood vessels (Nyberg *et al.*, 2005). Many of these inhibitors are derived from extracellular matrix molecules, such as endostatin (Ribatti, 2009). This 20–22 kDa C-terminal fragment of type XVIII collagen, which was originally isolated and purified from conditioned media of murine hemangioendothelioma cells (O'Reilly *et al.*, 1997), binds to  $\alpha_v\beta_1$  integrin and E-selectin on endothelial cells and is a broad spectrum angiogenesis inhibitor, affecting hundreds of pathways regulating the process of blood vessel development (Folkman, 2006). Accordingly, endostatin inhibits the proliferation and migration of endothelial cells and induces their apoptotic cell death (Dhanabal *et al.*, 1999a, b). Moreover, endostatin suppresses matrix metalloproteinase (MMP)-2, -9 and -13 activity and blocks the binding of VEGF to its receptor (Kim *et al.*, 2000, 2002). During the last years, several independent groups demonstrated that treatment with endostatin or short synthetic endostatin peptides inhibits angiogenesis of newly developing endometriotic lesions (Becker *et al.*, 2005, 2006a, b; Nap *et al.*, 2005; Jiang *et al.*, 2007) and already established ones (Nap *et al.*,

2004). Importantly, this type of treatment does not interfere with fertility and pregnancy in mice (Becker *et al.*, 2005, 2006a). Additional clinical data indicate a favourable toxicity profile of endostatin (Eder *et al.*, 2002). In fact, endostatin has virtually no toxicity and has revealed no problems with resistance even during administration to patients every day for up to >3.5 years without interruption (Folkman, 2006). However, a major prerequisite for the broad clinical applicability of this endogenous angiogenesis inhibitor in future endometriosis therapy is the synthesis of large quantities of pharmaceutical grade protein, which is still an unsolved problem (Ribatti, 2009).

Another endogenous inhibitor of angiogenesis is angiostatin, which is a 38 kDa fragment of plasminogen (O'Reilly *et al.*, 1994; Ribatti, 2009). Similar to endostatin, angiostatin affects multiple mechanisms of blood vessel development. For instance, angiostatin has been shown to suppress proliferation and to induce apoptosis of the endothelium (Sim *et al.*, 2000). Moreover, it inhibits VEGF and bFGF signalling (Sim *et al.*, 2000). The anti-angiogenic effects of angiostatin are mediated by its binding to various cell surface proteins, including ATP synthase, angiomin,  $\alpha_v\beta_3$  integrin, annexin II, angiostatin binding sequence protein, c-met and NG2 proteoglycan, as well as extracellular targets, such as tissue plasminogen activator (Wahl *et al.*, 2005). Dabrosin *et al.* (2002) treated endometriotic lesions in estrogen-supplemented ovariectomized mice by transient overexpression of the angiostatin gene, which was delivered to the peritoneum by a replica-deficient adenovirus vector. Gene therapy may overcome the major problem that angiostatin has a short half-life in the circulation and, thus, a short interval dosing is necessary to maintain its effects under clinical conditions (Beerepoot *et al.*, 2003; Wahl *et al.*, 2005). However, although effective, this type of treatment impaired normal

**Table II Studies focusing on the anti-angiogenic effect of different compounds on endometriosis.**

| Substance group                    | Study                                                   | Compound                                                 | Species or cell culture/tissue type/transplantation site                                  | Anti-angiogenic effects on endometriosis                                                                           |
|------------------------------------|---------------------------------------------------------|----------------------------------------------------------|-------------------------------------------------------------------------------------------|--------------------------------------------------------------------------------------------------------------------|
| Growth factor inhibitors           | Becker <i>et al.</i> (2008)                             | 2-Methoxyestradiol                                       | C57BL/6 mice/mouse endometrium/peritoneal cavity                                          | Suppression of HIF-1 $\alpha$ and VEGF expression, reduced vascular permeability                                   |
|                                    | Hull <i>et al.</i> (2003)                               | Soluble truncated Flt-1 receptor, anti-VEGF antibody     | Nude mice/human endometrium/subcutis                                                      | Disruption of immature microvessels                                                                                |
|                                    | Laschke <i>et al.</i> (2006a)                           | SU5416, SU6668                                           | Syrian golden hamsters/hamster endometrium/dorsal skinfold chamber                        | Reduction of microvessel density, inhibition of vessel maturation                                                  |
|                                    | Nap <i>et al.</i> (2004)                                | Anti-VEGF antibody                                       | Nude mice/human endometrium/peritoneal cavity                                             | Reduction of microvessel density, disruption of immature microvessels                                              |
|                                    | Nap <i>et al.</i> (2005)                                | Anti-VEGF antibody                                       | Chicken/human endometrium/CAM assay                                                       | Reduction of microvessel density                                                                                   |
|                                    | Rein <i>et al.</i> (2010)<br>Ricci <i>et al.</i> (2011) | VEGF-targeted gene therapy<br>Bevacizumab                | Cell culture/human endometriotic cells<br>BALB/c mice/mouse endometrium/peritoneal cavity | Induction of apoptotic cell death<br>Reduction of microvessel density, decrease of VEGF levels in peritoneal fluid |
| Endogenous angiogenesis inhibitors | Becker <i>et al.</i> (2005)                             | Murine endostatin                                        | C57BL/6 mice/mouse endometrium/peritoneal cavity                                          | No specific anti-angiogenic effects reported                                                                       |
|                                    | Becker <i>et al.</i> (2006a)                            | Murine short synthetic endostatin peptides mP-1 and mP-6 | C57BL/6 mice/mouse endometrium/peritoneal cavity                                          | Suppression of VEGF-induced endothelial cell migration                                                             |
|                                    | Becker <i>et al.</i> (2006b)                            | Murine short synthetic endostatin peptide mP-1           | NOD-SCID or C57BL/6-Tyr <sup>c</sup> mice/mouse endometrium/peritoneal cavity             | Inhibition of blood vessel sprouting                                                                               |
|                                    | Dabrosin <i>et al.</i> (2002)                           | Angiostatin gene therapy                                 | C57BL/6 mice/mouse endometrium/peritoneal cavity                                          | Reduction of microvessel density                                                                                   |
|                                    | Jiang <i>et al.</i> (2007)                              | Recombinant human endostatin                             | SCID mice/human endometrium/subcutis                                                      | Suppression of VEGF expression, reduction of microvessel density                                                   |
|                                    | Nap <i>et al.</i> (2004)                                | Endostatin                                               | Nude mice/human endometrium/peritoneal cavity                                             | Reduction of microvessel density, disruption of immature microvessels                                              |
| Fumagillin analogues               | Nap <i>et al.</i> (2005)                                | Endostatin                                               | Chicken/human endometrium/CAM assay                                                       | Reduction of microvessel density                                                                                   |
|                                    | Becker <i>et al.</i> (2006b)                            | Caplostatin                                              | NOD-SCID or C57BL/6-Tyr <sup>c</sup> mice/mouse endometrium/peritoneal cavity             | Reduction of microvessel density                                                                                   |
|                                    | Becker <i>et al.</i> (2011)                             | Lodamin                                                  | 129S6/SvEvTac mice/mouse endometrium/peritoneal cavity                                    | Reduction of circulating endothelial progenitor cells                                                              |
|                                    | Nap <i>et al.</i> (2004)                                | TNP-470                                                  | Nude mice/human endometrium/peritoneal cavity                                             | Reduction of microvessel density, disruption of immature microvessels                                              |
| Statins                            | Nap <i>et al.</i> (2005)                                | TNP-470                                                  | Chicken/human endometrium/CAM assay                                                       | Reduction of microvessel density                                                                                   |
|                                    | Bruner-Tran <i>et al.</i> (2009)                        | Simvastatin                                              | Nude mice/human endometrium/subcutis                                                      | Reduction of microvessel density                                                                                   |
|                                    | Cakmak <i>et al.</i> (2012)                             | Simvastatin                                              | Nude mice/human endometrium/peritoneal cavity                                             | Suppression of MCP-1 expression                                                                                    |
|                                    | Esfandiari <i>et al.</i> (2007)                         | Lovastatin                                               | Fibrin culture system/human endometrium                                                   | Inhibition of vascular sprouting                                                                                   |
|                                    | Oktem <i>et al.</i> (2007)                              | Atorvastatin                                             | Wistar rats/rat endometrium/peritoneal cavity                                             | Reduction of VEGF levels in peritoneal fluid                                                                       |
|                                    | Sharma <i>et al.</i> (2010)                             | Atorvastatin                                             | Cell culture/human ectopic and eutopic endometrial stromal cells                          | Reduction of VEGF, RAGE, EN-RAGE and COX-2 expression                                                              |

|                                       |                                                                        |                                                                |                                                                                                               |                                                                                                              |
|---------------------------------------|------------------------------------------------------------------------|----------------------------------------------------------------|---------------------------------------------------------------------------------------------------------------|--------------------------------------------------------------------------------------------------------------|
| COX-2 inhibitors                      | Dogan <i>et al.</i> (2004)                                             | Rofecoxib                                                      | Wistar rats/rat endometrium/peritoneal cavity                                                                 | Reduction of VEGF levels in peritoneal fluid                                                                 |
|                                       | Hull <i>et al.</i> (2005)<br>Laschke <i>et al.</i> (2007)              | Nimesulide<br>NS398                                            | Nude mice/human endometrium/subcutis<br>Syrian golden hamsters/hamster endometrium/dorsal skinfold chamber    | No anti-angiogenic effect<br>Reduction of microvessel density and VEGF expression                            |
| Phytochemical compounds               | Machado <i>et al.</i> (2010)                                           | Parecoxib                                                      | Sprague-Dawley rats/rat endometrium/peritoneal cavity                                                         | Reduction of microvessel density, decreased expression of VEGF and Flk-1                                     |
|                                       | Olivares <i>et al.</i> (2011)<br>Ozawa <i>et al.</i> (2006)            | Celecoxib<br>NS398                                             | BALB/c mice/mouse endometrium/peritoneal cavity<br>SCID mice/human endometriotic tissue/peritoneal cavity     | Reduction of vascularized lesion area<br>Reduction of microvessel density and VEGF expression                |
|                                       | Laschke <i>et al.</i> (2008)                                           | EGCG                                                           | Syrian golden hamsters/hamster endometrium/dorsal skinfold chamber                                            | Reduction of microvessel density and blood perfusion, inhibition of estrogen-stimulated VEGF expression      |
|                                       | Laschke <i>et al.</i> (2010)                                           | Genistein                                                      | Syrian golden hamsters/hamster endometrium/dorsal skinfold chamber                                            | Delayed lesion vascularization                                                                               |
|                                       | Laschke <i>et al.</i> (2011c)                                          | 4-Hydroxybenzyl alcohol                                        | C57BL/6 mice/mouse endometrium/dorsal skinfold chamber                                                        | Reduction of microvessel density                                                                             |
|                                       | Rudzitis-Auth <i>et al.</i> (2012)                                     | Xanthohumol                                                    | BALB/c mice/mouse endometrium/peritoneal cavity                                                               | Reduction of microvessel density, inhibition of endothelial cell proliferation                               |
|                                       | Wang <i>et al.</i> (2011)                                              | Puerarin                                                       | Chicken/human endometriotic tissue/CAM assay                                                                  | Reduction of microvessel density, suppression of MMP-9, ICAM-1 and VEGF expression                           |
|                                       | Xu <i>et al.</i> (2009)                                                | EGCG                                                           | SCID mice/human endometrium/subcutis                                                                          | Reduction of microvessel size and density, decrease of VEGF-A mRNA                                           |
| Immunomodulators                      | Xu <i>et al.</i> (2011)<br>Zhang <i>et al.</i> (2011)                  | EGCG<br>Curcumin                                               | SCID mice/human endometrium/subcutis<br>Wistar rats/rat endometrium/subcutis                                  | Suppression of VEGF-C/VEGFR2 signalling<br>Reduction of microvessel density and VEGF expression              |
|                                       | Laschke <i>et al.</i> (2006b)                                          | Rapamycin                                                      | Syrian golden hamsters/hamster endometrium/dorsal skinfold chamber                                            | Reduction of microvessel density, VEGF expression and endothelial cell proliferation                         |
|                                       | Vlahos <i>et al.</i> (2010)<br>Xu <i>et al.</i> (2012)                 | Pentoxifylline<br>Lipoxin A4                                   | Wistar rats/rat endometrium/peritoneal cavity<br>BALB/c mice/mouse endometrium/peritoneal cavity              | Decreased expression of VEGF-C and Flk-1<br>Reduced activity of MMP-9, decreased mRNA levels of VEGF         |
| Dopamine agonists                     | Delgado-Rosas <i>et al.</i> (2011)                                     | Quinagolide, cabergoline                                       | Nude mice/human endometrium/peritoneal cavity                                                                 | Reduction of microvessel density and angiogenic gene expression                                              |
|                                       | Gómez <i>et al.</i> (2011)                                             | Quinagolide                                                    | Humans/human endometriotic lesions                                                                            | Down-regulation of VEGF/VEGFR2, CCL2, RUNX1, AGGF1 and PAI-1                                                 |
|                                       | Novella-Maestre <i>et al.</i> (2009)                                   | Cabergoline                                                    | Nude mice/human endometrium/peritoneal cavity                                                                 | Reduction of microvessel density, suppression of VEGF and Notch-4 expression, up-regulation of Ang-1 and Wnt |
|                                       | Novella-Maestre <i>et al.</i> (2010)                                   | Cabergoline                                                    | Nude mice/human endometrium/peritoneal cavity                                                                 | Inhibition of VEGF and VEGFR-2 expression                                                                    |
| PPAR agonists                         | Herington <i>et al.</i> (2011)<br>Peeters <i>et al.</i> (2005)         | Pioglitazone<br>Rosiglitazone                                  | Nude mice/human endometrium/peritoneal cavity<br>Cell culture/human transformed and primary endometrial cells | Reduction of microvessel density<br>Suppression of VEGF expression                                           |
|                                       | Onalan <i>et al.</i> (2009)                                            | Fenofibrate                                                    | Wistar rats/rat endometrium/peritoneal cavity                                                                 | Reduction of VEGF levels in peritoneal fluid                                                                 |
| Progestins, danazol and GnRH agonists | Katayama <i>et al.</i> (2010)                                          | Dienogest                                                      | Wistar rats/rat endometrium/dorsal skinfold chamber                                                           | Reduction of microvessel density and blood perfusion, suppression of blood vessel maturation                 |
|                                       | Khan <i>et al.</i> (2010)                                              | Leuprolide acetate                                             | Humans/human endometriotic lesions                                                                            | Reduction of macrophage infiltration and microvessel density, increase of apoptotic cell death               |
|                                       | Matalliotakis <i>et al.</i> (2003)<br>Mönckedieck <i>et al.</i> (2009) | Danazol<br>Progesterone, dydrogesterone, dihydrodydrogesterone | Humans/serum samples<br>Nude mice/human endometrium/peritoneal cavity                                         | Reduction of VEGF serum levels<br>Suppression of bFGF, VEGF-A, Cyr-61 and MMP expression                     |

Continued

Table II Continued

| Substance group | Study                       | Compound                | Species or cell culture/tissue type/transplantation site       | Anti-angiogenic effects on endometriosis                                                                        |
|-----------------|-----------------------------|-------------------------|----------------------------------------------------------------|-----------------------------------------------------------------------------------------------------------------|
| Other agents    | Feng <i>et al.</i> (2012)   | Quinalizarin            | C57BL/6 mice/mouse endometrium/dorsal skinfold chamber         | Reduction of vascularized area and microvessel density                                                          |
|                 | Imesch <i>et al.</i> (2011) | Ronidepsin              | Cell culture/human immortalized epithelial endometriotic cells | Inhibition of VEGF gene transcription, protein expression and secretion, reduction of HIF-1 $\alpha$ expression |
|                 | Krikun <i>et al.</i> (2010) | Immunconjugate molecule | Nude mice/human endometrium/peritoneal cavity                  | Disruption of tissue factor-expressing microvessels                                                             |
|                 | Nap <i>et al.</i> (2004)    | Anginex                 | Nude mice/human endometrium/peritoneal cavity                  | Reduction of microvessel density, disruption of immature microvessels                                           |
|                 | Nap <i>et al.</i> (2005)    | Anginex                 | Chicken/human endometrium/CAM assay                            | Reduction of microvessel density                                                                                |

AGGF1, angiogenic factor with G patch and FHA domains 1; Ang-1, angiopoietin-1; bFGF, basic fibroblast growth factor; CAM, chorioallantois membrane; CCL2, chemokine ligand 2; COX, cyclo-oxygenase; Cyr-61, cysteine rich protein 61; EGCG, epigallocatechin-3-gallate; Flk-1, fetal liver kinase-1; Flt-1, fms-related tyrosine kinase 1; HIF-1 $\alpha$ , hypoxia-inducible factor-1 $\alpha$ ; ICAM, intercellular adhesion molecule 1; MCP-1, monocyte chemoattractant protein-1; MMP, matrix metalloproteinase; NOD-SCID, non-obese diabetic-severe combined immunodeficiency; PAI-1, plasminogen activator inhibitor-1; RAGE, receptor for advanced glycation endproducts; RUNX1, Runt-related transcription factor 1; VEGF, vascular endothelial growth factor.

The table also lists the species in which the analyses have been performed. Where appropriate, additional information is provided about the type of tissue used and the transplantation site for the experimental induction of endometriotic lesions.

ovarian function, as indicated by suppressed corpus luteum development, decreased sex steroid production and reduced ovarian and uterine weight (Dabrosin *et al.*, 2002). Thus, this therapeutic approach has to be further optimized by controlled local or targeted delivery of the angiostatic gene to minimize deleterious side effects on normal reproductive function.

### Fumagillin analogues

Fumagillin is a naturally occurring antibiotic of *Aspergillus fumigatus* with anti-angiogenic activity (Ingber *et al.*, 1990). TNP-470 (formerly AGM-1470) is a highly potent semisynthetic derivative of fumagillin, which targets methionine aminopeptidase-2, affects cell-cycle regulation through induction of p53 and p21/WAF1/CIP1 and prevents VEGF-induced endothelial permeability, intercellular gap formation and ruffle formation by suppression of Rac1 activation (Sin *et al.*, 1997; Nahari *et al.*, 2007; Benny *et al.*, 2008). Since its discovery, TNP-470 has been proved in various experimental and clinical studies to act as an effective angiogenesis inhibitor in different tumour types (Kruger and Figg, 2000). In line with these studies, Nap *et al.* (2004, 2005) showed that TNP-470 impairs the formation of endometriotic lesions in the CAM assay and the nude mouse model, which is associated with a decreased microvessel density of the ectopic endometrial tissue when compared with controls. However, despite these promising results, TNP-470 is rather unsuitable for the anti-angiogenic treatment of endometriosis in clinical practice because it exerts strong side effects on the female reproductive organs, including inhibition of endometrial maturation and corpora lutea formation as well as failure of embryonic growth during pregnancy (Klauber *et al.*, 1997). Another major drawback of TNP-470 is its neurotoxicity (Bhargava *et al.*, 1999). To overcome this, Satchi-Fainaro *et al.* (2004) synthesized a derivative of TNP-470, i.e. caplostatin, which is conjugated to a water-soluble synthetic *N*-(2-hydroxypropyl)methacrylamide copolymer. Thus, it does not cross the blood-brain barrier and exhibits a decreased accumulation in normal organs. Becker *et al.* (2006b) treated mouse endometriotic lesions with caplostatin and analysed their growth and vascularization over time using the non-invasive imaging technique of bioluminescence. Notably, they found that caplostatin suppresses angiogenesis within the lesions without exerting any general or specific toxic effects on reproductive function. Thus, this non-toxic fumagillin analogue may be a candidate for future anti-angiogenic therapy. However, caplostatin shares the major clinical limitation with TNP-470 that it exhibits a poor oral availability and extremely a short plasma half-life (Benny *et al.*, 2008). Therefore, Benny *et al.* (2008) created lodamin by conjugating TNP-470 to an amphiphilic polymer, which results in the assembly of micelles in which the drug is enclosed and protected from the acidic environment of the stomach. Of interest, Becker *et al.* (2011) recently found that lodamin treatment of endometriosis-bearing mice significantly decreases levels of circulating endothelial progenitor cells, which have been shown to act as major contributors to the vascularization of endometriotic lesions (Laschke *et al.*, 2011a, b).

### Statins

Statins are a class of lipid-lowering drugs, which inhibit cholesterol synthesis by blocking 3-hydroxy-3-methylglutaryl-co-enzyme A reductase

**Table III** Specific targets or mechanisms of action and reported side effects of compounds, which have been shown to exert anti-angiogenic effects on endometriosis.

| Substance group          | Compound                                                 | Specific targets, mechanisms of action                                                                                                                                                                                                                                                                                                                                                                   | Side effects reported in experimental (E) and clinical (C) studies                                                                                                                                                                                                                                                                                                      |
|--------------------------|----------------------------------------------------------|----------------------------------------------------------------------------------------------------------------------------------------------------------------------------------------------------------------------------------------------------------------------------------------------------------------------------------------------------------------------------------------------------------|-------------------------------------------------------------------------------------------------------------------------------------------------------------------------------------------------------------------------------------------------------------------------------------------------------------------------------------------------------------------------|
| Growth factor inhibitors | Anti-VEGF antibody (= bevacizumab)<br>2-Methoxyestradiol | Neutralization of active VEGF-A (Ferrara <i>et al.</i> , 2005)<br><br>Inhibition of the expression, nuclear accumulation and transcriptional activity of HIF-1 $\alpha$<br>Induction of apoptosis through activation of caspase cascade<br>Inhibition of tubulin polymerization by binding to the colchicine site of tubulin<br>Induction of endothelial nitric oxide synthase (Verenich and Gerk, 2010) | Hypertension, proteinuria, impaired wound healing, gastrointestinal perforation, thrombosis, bleeding (C) (Kamba and McDonald, 2007)<br>Hot flashes, fatigue, diarrhoea, nausea, hyperglycaemia, anaemia, oedema, thrombosis, elevation of liver transaminases (C) (Dahut <i>et al.</i> , 2006)                                                                         |
|                          | SU5416                                                   | Selective inhibition of the tyrosine kinase activity of VEGFR-2 (Mendel <i>et al.</i> , 2000)                                                                                                                                                                                                                                                                                                            | Headache, fatigue, nausea, vomiting, diarrhoea, pain, hyperglycaemia, elevated prothrombin time (C) (Fury <i>et al.</i> , 2007)                                                                                                                                                                                                                                         |
|                          | SU6668                                                   | Inhibition of the tyrosine kinase activity of VEGFR-2, PDGFR- $\beta$ , FGFR-1 (Hoekman, 2001)                                                                                                                                                                                                                                                                                                           | Fatigue, nausea, vomiting, diarrhoea, pain, flu-like complaints, anorexia, change of taste (C) (Kuenen <i>et al.</i> , 2005)                                                                                                                                                                                                                                            |
|                          | Endogenous angiogenesis inhibitors                       | Endostatin                                                                                                                                                                                                                                                                                                                                                                                               | Binding to $\alpha_v\beta_1$ integrin and E-selectin<br>Pleiotropic action on hundreds of genetic pathways regulating angiogenesis<br>Inhibition of endothelial cell proliferation and migration<br>Induction of endothelial cell apoptosis<br>Suppression of MMP-2, -9 and -13 activity<br>Blockade of VEGF signalling (Kim <i>et al.</i> , 2000, 2002; Folkman, 2006) |
| Angiostatin              |                                                          | Binding to ATP synthase, angiomin, $\alpha_v\beta_3$ integrin, annexin II, angiostatin binding sequence protein, c-met and NG2 proteoglycan on the cell surface<br>Binding to tissue plasminogen activator<br>Inhibition of endothelial cell proliferation<br>Induction of endothelial cell apoptosis<br>Inhibition of VEGF and bFGF signalling (Sim <i>et al.</i> , 2000; Wahl <i>et al.</i> , 2005)    | Suppression of ovarian function (E) (Dabrosin <i>et al.</i> , 2002)<br>Erythema at injection site, fatigue, nausea, deep venous thrombosis (C) (Beerepoot <i>et al.</i> , 2003)                                                                                                                                                                                         |
| Fumagillin analogues     | TNP-470 (= AGM-1470)                                     | Inhibition of MetAP-2<br>Induction of p53 and p21/WAF1/CIP1<br>Suppression of Rac1 activation (Sin <i>et al.</i> , 1997; Nahari <i>et al.</i> , 2007; Benny <i>et al.</i> , 2008)                                                                                                                                                                                                                        | Inhibition of endometrial maturation and corpora lutea formation, embryotoxicity (E) (Klauber <i>et al.</i> , 1997)<br>Neurotoxicity, nausea, fatigue (C) (Bhargava <i>et al.</i> , 1999)                                                                                                                                                                               |
|                          | Caplostatin                                              | See TNP-470                                                                                                                                                                                                                                                                                                                                                                                              | No reported treatment-related side effects (E) (Satchi-Fainaro <i>et al.</i> , 2004; Becker <i>et al.</i> , 2006b)                                                                                                                                                                                                                                                      |
|                          | Lodamin                                                  | See TNP-470                                                                                                                                                                                                                                                                                                                                                                                              | No reported treatment-related side effects (E) (Benny <i>et al.</i> , 2008; Becker <i>et al.</i> , 2011)                                                                                                                                                                                                                                                                |
| Statins                  | Atorvastatin, Lovastatin, Simvastatin                    | Blockade of HMG-CoA reductase<br>Inhibition of endothelial cell proliferation<br>Induction of apoptosis by activation of the caspase cascade<br>Down-regulation of VEGF synthesis<br>Suppression of MMP secretion (Dulak and Józkwicz, 2005)                                                                                                                                                             | No reported treatment-related side effects on reproductive function (E) (Oktem <i>et al.</i> , 2007)<br>Myopathy, diabetes mellitus, asymptomatic elevation of liver transaminases (C) (Mancini <i>et al.</i> , 2011)                                                                                                                                                   |
| COX-2 inhibitors         | Celecoxib, Nimesulide, NS398, Parecoxib, Rofecoxib       | Inhibition of COX-2<br>Inhibition of carbonic anhydrases<br>Inhibition of PDK1<br>Induction of apoptosis by inhibition of SERCA (Schönthal, 2007)                                                                                                                                                                                                                                                        | Cardiovascular events (myocardial infarction, stroke, thrombosis), hypertension, wound healing complications, renal failure or dysfunction, gastroduodenal ulcers (C) (Becker, 2005; Nussmeier <i>et al.</i> , 2005; Solomon <i>et al.</i> , 2005)                                                                                                                      |
| Phytochemical compounds  | EGCG                                                     | Pleiotropic action on multiple molecular mechanisms including protection of DNA, inhibition of proteasome activity and gene expression, induction of apoptosis, cell-cycle regulation and cell proliferation (Chen <i>et al.</i> , 2011)                                                                                                                                                                 | Anxiolytic activity, hypoglycaemic activity, hepatotoxicity (E) (Mereles and Hunstein, 2011)<br>Nausea (C) (Chow <i>et al.</i> , 2003)                                                                                                                                                                                                                                  |

Continued



**Table III** *Continued*

| Substance group   | Compound                | Specific targets, mechanisms of action                                                                                                                                                                                                                                | Side effects reported in experimental (E) and clinical (C) studies                                                                                                                           |
|-------------------|-------------------------|-----------------------------------------------------------------------------------------------------------------------------------------------------------------------------------------------------------------------------------------------------------------------|----------------------------------------------------------------------------------------------------------------------------------------------------------------------------------------------|
|                   | Curcumin                | Pleiotropic interaction with numerous molecular targets including transcription factors, growth factors, protein kinases, inflammatory cytokines, enzymes, adhesion molecules and apoptosis-related proteins (Wilken <i>et al.</i> , 2011; Zhou <i>et al.</i> , 2011) | No reported treatment-related side effects (E) (Zhang <i>et al.</i> , 2011)<br>No reported treatment-related side effects (C) (Wilken <i>et al.</i> , 2011)                                  |
|                   | Puerarin                | Pleiotropic interaction with numerous molecular targets including growth factors, anti-oxidative enzymes, MMPs, cell proliferation-related and apoptosis-related proteins (Liu <i>et al.</i> , 2012)                                                                  | No reported treatment-related side effects (C) (Tan <i>et al.</i> , 2008)                                                                                                                    |
|                   | Genistein               | Pleiotropic interaction with numerous molecular targets including transcription factors, growth factors, protein kinases, inflammatory cytokines, enzymes, adhesion molecules and apoptosis-related proteins (Shanmugam <i>et al.</i> , 2011)                         | Genotoxicity, infertility, disruption of oestrous cyclicity and ovarian function (E) (Stopper <i>et al.</i> , 2005; Jefferson <i>et al.</i> , 2007)                                          |
|                   | 4-Hydroxybenzyl alcohol | Pleiotropic interaction with numerous molecular targets including cytoprotective genes, neurotrophic factors, growth factors, anti-oxidative enzymes, MMPs and cell proliferation-related proteins (Descamps <i>et al.</i> , 2009; Laschke <i>et al.</i> , 2011c)     | No reported treatment-related side effects (E) (Descamps <i>et al.</i> , 2009; Laschke <i>et al.</i> , 2011c)                                                                                |
|                   | Xanthohumol             | Pleiotropic action on numerous cellular mechanisms including proliferation, differentiation, apoptosis, inflammation and angiogenesis (Gerhauser <i>et al.</i> , 2002)                                                                                                | No reported treatment-related side effects (E) (Dorn <i>et al.</i> , 2010; Rudzitis-Auth <i>et al.</i> , 2012)                                                                               |
| Immunomodulators  | Rapamycin               | Inhibition of mTOR<br>Inhibition of VEGF signalling (Guba <i>et al.</i> , 2002)                                                                                                                                                                                       | Anaemia, leukopenia, thrombozytopenia, hypercholesterolemia, arthralgias, oedema, impaired wound healing, pulmonary toxicity, angioedema, nephrotoxicity (C) (Buhaescu <i>et al.</i> , 2006) |
|                   | Lipoxin A4              | Multiple anti-inflammatory effects via activation of the FPR2/ALX receptor<br>Inhibition of VEGF-stimulated angiogenesis (Baker <i>et al.</i> , 2009; Romano, 2010; Hao <i>et al.</i> , 2011)                                                                         | No adverse effects on estradiol and progesterone levels or oestrus cycling (E) (Xu <i>et al.</i> , 2012)                                                                                     |
|                   | Pentoxifylline          | Pleiotropic action on the production of inflammatory mediators and the responsiveness of immunocompetent cells to inflammatory stimuli<br>Suppression of VEGF signalling (Olive <i>et al.</i> , 2004; Vlahos <i>et al.</i> , 2010)                                    | Gastric discomfort, dizziness (C) (Olive <i>et al.</i> , 2004)                                                                                                                               |
| Dopamine agonists | Cabergoline             | Binding to dopamine D2 receptor<br>Inhibition of VEGFR-2 phosphorylation<br>Suppression of Notch-4, VEGF and VEGFR-2 expression<br>Up-regulation of Ang-1 and Wnt (Gomez <i>et al.</i> , 2006; Novella-Maestre <i>et al.</i> , 2009)                                  | Cardiac valve regurgitation, nausea, headache, dizziness, fatigue, constipation (C) (Webster <i>et al.</i> , 1992; Schade <i>et al.</i> , 2007)                                              |
|                   | Quinagolide             | Binding to dopamine D2 receptor<br>Down-regulation of VEGF/VEGFR-2, pro-angiogenic cytokines and PAI-1 (Gómez <i>et al.</i> , 2011)                                                                                                                                   | Nausea, headache (C)<br>No teratogenic effects (C) (Barlier and Jaquet, 2006)                                                                                                                |
| PPAR agonists     | Fenofibrate             | Binding to PPAR- $\alpha$<br>Pleiotropic action on multiple processes including energy homeostasis, metabolism, inflammation and angiogenesis (Tyagi <i>et al.</i> , 2011)                                                                                            | Increase of plasma creatinine and homocysteine levels, myopathy, thrombosis, pulmonary embolism, pancreatitis (C) (Keech <i>et al.</i> , 2005; Bouhlel <i>et al.</i> , 2008)                 |
|                   | Rosiglitazone           | Binding to PPAR- $\gamma$<br>Pleiotropic action on multiple processes including energy homeostasis, metabolism, inflammation and angiogenesis (Tyagi <i>et al.</i> , 2011)                                                                                            | Myocardial infarction, fluid retention, weight gain, bone fractures (C) (Nissen and Wolski, 2007; Tolman, 2011)                                                                              |
|                   | Pioglitazone            | See rosiglitazone                                                                                                                                                                                                                                                     | Urinary bladder cancer, fluid retention, weight gain, bone fractures (C) (Tolman, 2011; Balakumar and Kathuria, 2012)                                                                        |

|                                       |                                                                |                                                                                                                                            |                                                                                                                                                                             |
|---------------------------------------|----------------------------------------------------------------|--------------------------------------------------------------------------------------------------------------------------------------------|-----------------------------------------------------------------------------------------------------------------------------------------------------------------------------|
| Progestins, danazol and GnRH agonists | Progesterone, dydrogesterone, dihydrodydrogesterone, dienogest | Binding to steroid hormone receptors (Sitruk-Ware, 2006; Mönckedieck <i>et al.</i> , 2009)                                                 | Breast pain, headache, acne, alopecia, migraine, weight gain, abnormal menstrual bleeding patterns, depression, decreased libido (C) (Gulida <i>et al.</i> , 2010)          |
|                                       | Danazol                                                        | Induction of anovulation<br>Increasing free testosterone (Canavan and Radosh, 2000)                                                        | Hirsutism, depend voice, acne, fluid retention, weight gain, sweating, reduction in breast size, decreased HDL and increased LDL cholesterol (C) (Canavan and Radosh, 2000) |
|                                       | Leuprolide acetate                                             | Binding to the GnRH receptor (Wilson <i>et al.</i> , 2007)                                                                                 | Nausea, decrease in bone mineral density, decreased libido, depression, hot flashes, insomnia, headache, weight gain (C) (Wilson <i>et al.</i> , 2007)                      |
| Other agents                          | Anginex<br>Romidepsin                                          | Mimicking of $\beta$ -sheet domains of anti-angiogenic agents (Griffioen <i>et al.</i> , 2001)<br>Inhibition of HDAC                       | No reported treatment-related side effects (E) (Dings <i>et al.</i> , 2003)                                                                                                 |
|                                       | Quinalizarin                                                   | Pleiotropic action on tumour suppressor gene transcription, cell-cycle regulation, apoptosis, angiogenesis (Coiffier <i>et al.</i> , 2012) | Infections, nausea, fatigue, thrombocytopenia, vomiting, diarrhoea (C) (Coiffier <i>et al.</i> , 2012)                                                                      |
|                                       | Immunoc conjugate molecule Icon                                | Inhibition of protein kinase CK2 (Feng <i>et al.</i> , 2012)<br>Binding to aberrant tissue factor (Krikun <i>et al.</i> , 2010)            | Unknown<br>No adverse effects on fertility, no teratogenicity (E) (Krikun <i>et al.</i> , 2010)                                                                             |

ATP, adenosinotriphosphate; FGFR, fibroblast growth factor receptor; HMG-CoA, 3-hydroxy-3-methylglutaryl-co-enzyme A; MetAP-2, methionine aminopeptidase-2; mTOR, mammalian target of rapamycin; NG2, neuron-gial antigen 2; PDGFR, platelet-derived growth factor receptor; PDK1, 3-phosphoinositide-dependent protein kinase-1; PPAR, peroxisome proliferator-activated receptor; Rac1, Ras-related C3 botulinum toxin substrate 1; SERCA, sarcoplasmic/endoplasmatic reticulum calcium ATPase; VEGFR, vascular endothelial growth factor receptor.

(Brautbar and Ballantyne, 2011). They are widely used for the treatment of hypercholesterolemia and associated cardiovascular diseases. In addition, statins in high doses have been shown to exhibit anti-angiogenic activity, mediated by multiple mechanisms including the suppression of endothelial cell proliferation, induction of apoptotic cell death, down-regulation of VEGF synthesis and inhibition of MMP secretion (Dulak and Józkowicz, 2005).

Esfandiari *et al.* (2007) investigated the effect of statins on cell proliferation and angiogenesis in a novel *in vitro* model of endometriosis. For this purpose, human endometrial fragments were placed in a three-dimensional fibrin culture system and exposed to different concentrations of lovastatin. Of interest, they could demonstrate that lovastatin already suppresses vessel sprouting at the low concentration of 1  $\mu$ M, whereas cell proliferation is only inhibited at the higher concentrations of 5–10  $\mu$ M. Sharma *et al.* (2010) observed in atorvastatin-treated endometriotic stromal cells a significant inhibition of lipopolysaccharide-induced expression of genes encoding angiogenic factors, including VEGF. Oktem *et al.* (2007) tested the *in vivo* effect of atorvastatin in a rat model of surgically induced peritoneal endometriosis. They found that a low atorvastatin dose of 0.5 mg/kg per day increases the size of endometriotic lesions, whereas high doses of 2.5 mg/kg per day cause their regression and reduce VEGF levels in the peritoneal fluid of the animals. These are promising findings, taking into account that much higher atorvastatin doses of up to 175 mg/kg do not show any adverse effects on reproductive function (Oktem *et al.*, 2007). In the nude mouse model, 5 and 25 mg/kg simvastatin effectively inhibits growth and vascularization of developing endometriotic lesions (Bruner-Tran *et al.*, 2009) and suppresses the expression of monocyte chemotactic protein-1 (Cakmak *et al.*, 2012), which is known to stimulate the secretion of VEGF in endometrial stromal cells (Lin and Gu, 2005). Thereby, it should be mentioned that the discrepancy in the chosen statin doses in the described *in vivo* studies is related to the fact that atorvastatin is approximately two to four times more potent than simvastatin (Bruner-Tran *et al.*, 2009). This indicates that further studies are needed to identify the most suitable statins and their effective doses for the anti-angiogenic treatment of endometriosis. In this context, it has to be considered that the relatively high doses, which are normally required to induce anti-angiogenic effects, may increase the risk for typical side effects associated with statin therapy, such as myopathies (Dulak and Józkowicz, 2005; Mancini *et al.*, 2011).

## Cyclo-oxygenase-2 inhibitors

Cyclo-oxygenases (COXs) are enzymes of the myeloperoxidase family, which catalyse the initial step of prostaglandin synthesis from arachidonic acid (Smith *et al.*, 1996). COX-1 is constitutively expressed, whereas COX-2 is the inducible isoform that is up-regulated during inflammatory and angiogenic processes, such as tumour growth or inflammatory bowel disease (Wang and Dubois, 2010; Yao *et al.*, 2011).

Several studies report that COX-2 is also crucially involved in the pathogenesis of endometriosis. COX-2 over-expression is found in both endometriotic lesions and eutopic endometrium of patients with endometriosis when compared with controls (Ota *et al.*, 2001; Matsuzaki *et al.*, 2004a; Ceyhan *et al.*, 2008; Horn *et al.*, 2009; Cho *et al.*, 2010). Additional experimental studies demonstrate that

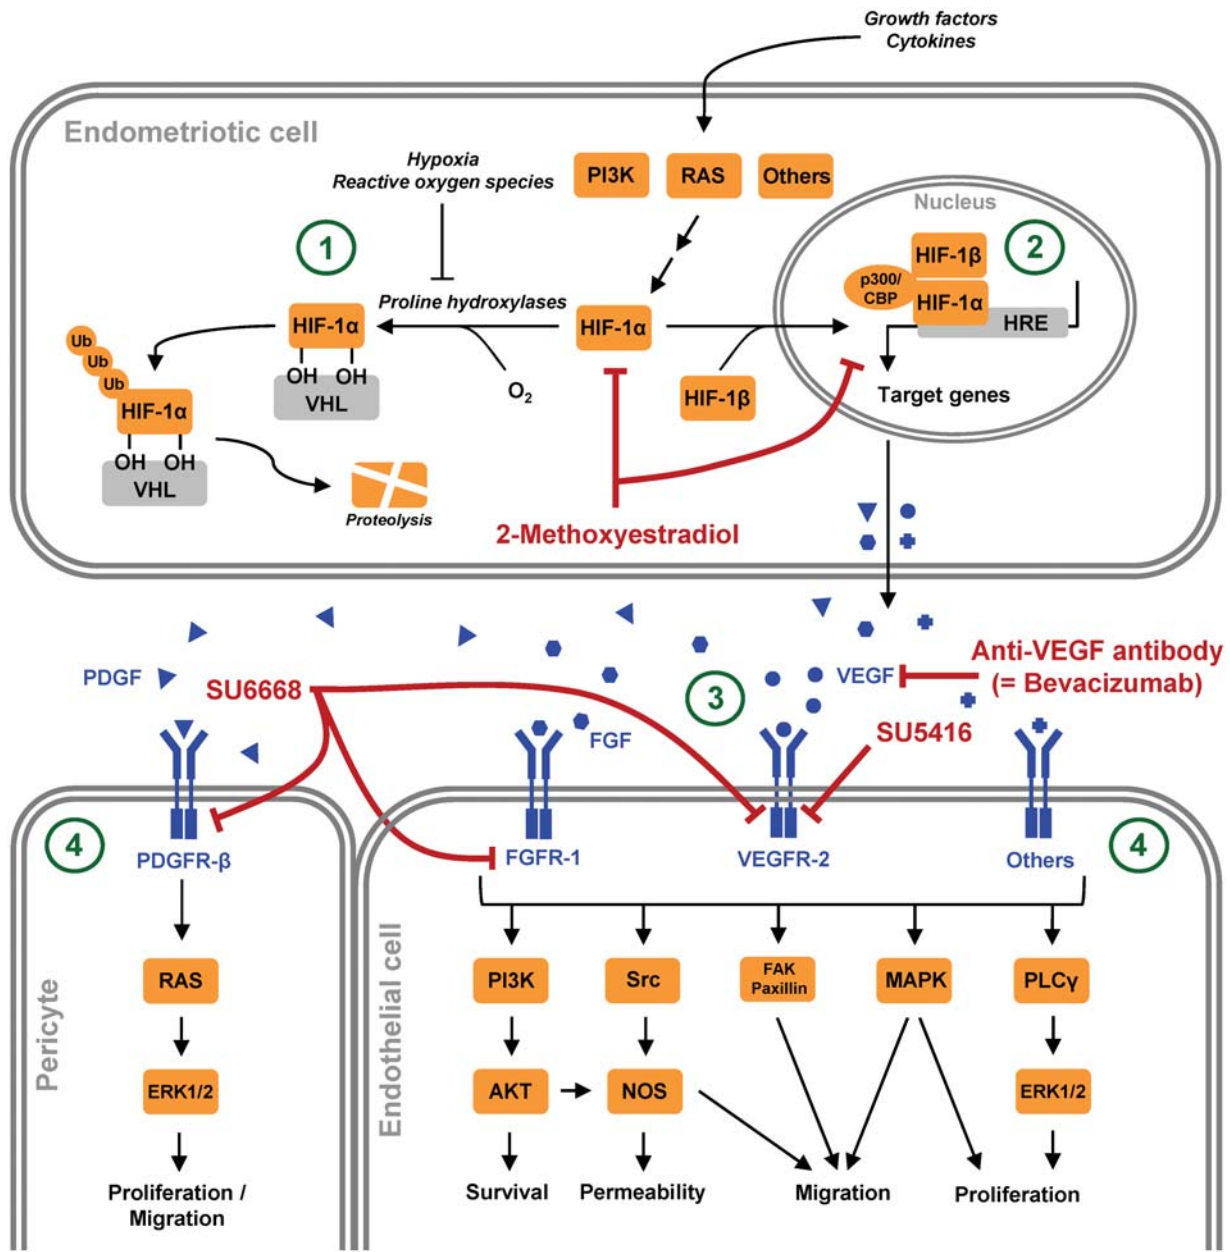

**Figure 3** Angiogenic signalling pathways in endometriosis and specific targets of growth factor inhibitors, which have been shown to exert anti-angiogenic effects on endometriotic lesions, i.e. anti-VEGF antibody (= bevacizumab), 2-methoxyestradiol, SU5416 and SU6668. Under normoxia, HIF-1 $\alpha$  is hydroxylated by proline hydroxylases following rapid VHL-dependent proteolysis (1). Under hypoxia, the proline hydroxylases are no longer active. HIF-1 translocates to the nucleus, where it targets genes (via HRE) encoding multiple proteins, including angiogenic growth factors (2). These growth factors are then secreted into the extracellular space where they bind to specific receptors located on the surface membrane of endothelial cells and pericytes (3). This leads to the activation of various intracellular signalling pathways, which regulate cell survival, proliferation, migration as well as vascular permeability (4). AKT, active human protein kinase; ERK, extracellular signal-regulated kinase; FAK, focal adhesion kinase; FGF, fibroblast growth factor; FGFR, fibroblast growth factor receptor; HIF, hypoxia-inducible factor; HRE, hypoxia-responsive elements; MAPK, mitogen-activated protein kinase; NOS, nitric oxide synthase; p300/CBP, p300/CREB-binding protein; PDGF, platelet-derived growth factor; PDGFR, platelet-derived growth factor receptor; PI3K, phosphatidylinositol-3-kinase; PLC $\gamma$ , phospholipase C $\gamma$ ; RAS, rat sarcoma GTPase; Src, tyrosine kinase; Ub, ubiquitin; VEGF, vascular endothelial growth factor; VEGFR, vascular endothelial growth factor receptor; VHL, von Hippel–Lindau protein.

treatment with COX-2 inhibitors prevents the implantation of endometrium to ectopic sites and induces the regression of established endometriotic lesions (Dogan *et al.*, 2004; Matsuzaki *et al.*, 2004b; Ozawa *et al.*, 2006; Machado *et al.*, 2010; Olivares *et al.*, 2011). These results can partly be explained by the inhibition of angiogenesis. In fact, treatment with the COX-2 inhibitor NS398 significantly decreases VEGF expression and microvessel density in ectopic endometrial tissue in the dorsal skinfold chamber model (Laschke *et al.*, 2007; Fig. 4). Besides this anti-angiogenic effect, application of NS398 further decreases the proliferation rate of endometrial cells and induces their apoptotic cell death (Laschke *et al.*, 2007). Thus, inhibition of COX-2 seems to have beneficial effects on multiple cellular mechanisms, promoting the final regression of endometriotic lesions. However, experimental studies indicate that this is not necessarily achieved by each COX-2 inhibitor. Hull *et al.* (2005) reported that treatment with nimesulide neither affects blood vessel development nor the number or size of endometriotic lesions in the nude mouse model. Whether these results are specific for nimesulide or also transferable to other COX-2 inhibitors needs further clarification in appropriate endometriosis models.

Presently, non-specific COX inhibitors, such as Ibuprofen or Aspirin, are already widely used for pain treatment in endometriosis (Ebert *et al.*, 2005). In comparison, specific COX-2 inhibitors bear the advantage that they exhibit many fewer gastrointestinal side effects (FitzGerald and Patrono, 2001). A first clinical trial indicated that they are also effective, safe and inexpensive in the management of endometriosis-associated pelvic pain (Cobellis *et al.*, 2004). Considering their additional anti-angiogenic action, these specific COX-2 inhibitors seem to be ideal for the treatment of endometriotic lesions. However, at the time of writing, COX-2 inhibitors have not been approved for endometriosis. This may be related to the fact that there are not enough clinical data available about their possible side effects on fertility and pregnancy. In addition, COX-2 inhibitors, such as rofecoxib and valdecoxib, have been withdrawn from the market because of an excess risk of cardiovascular events in long-term users, including myocardial infarction, stroke and thrombosis (Becker,

2005; Nussmeier *et al.*, 2005; Solomon *et al.*, 2005). Thus, although COX-2 inhibitors may be a suitable component of the multimodal endometriosis therapy of the future, these compounds can only be recommended at present for short-term treatment of patients with severe endometriosis, who are at low risk for cardiovascular events, under clearly defined study conditions.

## Phytochemical compounds

The demand for traditional medicine practices is rapidly rising in industrial countries (Wieser *et al.*, 2007). Accordingly, an increasing number of phytochemical compounds are presently analysed in terms of novel therapeutic indications. This trend is driven by the hope that these compounds, of which many have already been used for thousands of years in traditional Chinese medicine, promote health and well-being, while minimizing toxicities and side effects.

Among women with endometriosis, Chinese herbal medicine has gained popularity as alternative pain therapy despite the lack of conclusive clinical evidence (Cox *et al.*, 2003; Wieser *et al.*, 2007). Moreover, recent studies could identify several phytochemical compounds which induce the regression of endometriotic lesions under experimental conditions. These include epigallocatechin-3-gallate (EGCG; Laschke *et al.*, 2008; Xu *et al.*, 2009, 2011), curcumin (Zhang *et al.*, 2011), puerarin (Wang *et al.*, 2011), genistein (Yavuz *et al.*, 2007), 4-hydroxybenzyl alcohol (HBA; Laschke *et al.*, 2011c) and xanthohumol (Rudzitis-Auth *et al.*, 2012). These compounds typically act as pleiotropic agents, which influence multiple cellular mechanisms, such as proliferation, migration and apoptosis. Moreover, they inhibit the development of new blood vessels and, thus, can also be classified as anti-angiogenic agents.

The polyphenol EGCG is the major chemical component of green tea (Yang *et al.*, 2006). Using dosages of EGCG that have been shown to be growth inhibitory in tumour studies, EGCG suppresses the estrogen-stimulated activation, proliferation and VEGF expression of isolated endometrial cells (Laschke *et al.*, 2008). In line with these *in vitro* findings, EGCG further inhibits angiogenesis and blood perfusion

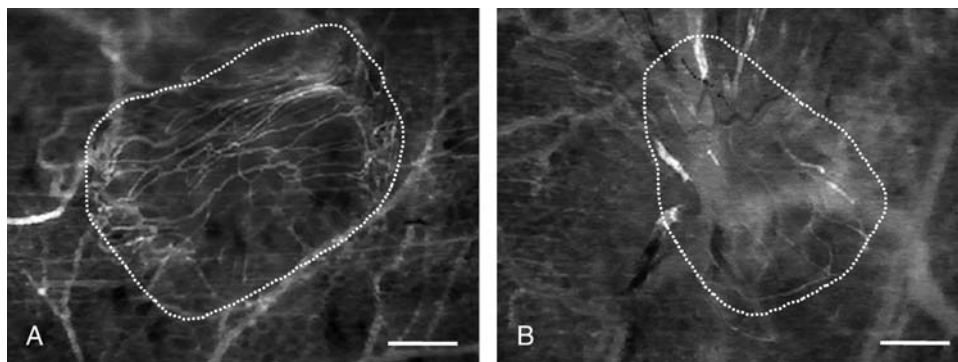

**Figure 4** *In vivo* analysis of the anti-angiogenic effect of the COX-2 inhibitor NS398 on developing endometriotic lesions, according to Laschke *et al.* (2007). Endometriotic lesions (A and B, borders marked by dotted line) are induced by endometrial tissue transplantation into dorsal skinfold chambers of Syrian golden hamsters and analysed by intravital fluorescence microscopy in blue-light epi-illumination with contrast enhancement of the microvasculature by iv application of 5% fluorescein isothiocyanate-labelled dextran 150 000. Note that the lesion, which has been treated for 10 days with the COX-2 inhibitor NS398, exhibits a markedly reduced microvessel density (B) when compared with the vehicle-treated control (A). This is associated with a decreased lesion size. Scale bars: 130  $\mu$ m.

of endometriotic lesions without affecting the development of new blood vessels in ovarian follicles (Laschke *et al.*, 2008). Xu *et al.* (2009) induced endometriotic lesions by transplanting eutopic endometrium from patients with endometriosis into subcutaneous pockets of severely compromised immunodeficient mice. Treatment of these lesions with EGCG over 2 weeks resulted in a reduced microvessel size and density of the lesions and the adjacent tissues. In an additional study by the same group, detailed angiogenesis microarray and pathway analyses revealed that this effect may be primarily mediated by the selective suppression of the VEGF-C/VEGFR2 signaling pathway (Xu *et al.*, 2011).

Curcumin is derived from the rhizome of the East Indian plant *Curcuma longa* and is the major component of the spice turmeric (Wilken *et al.*, 2011). In a recent study, Zhang *et al.* (2011) demonstrated that increasing curcumin doses of 50–150 mg/kg gradually reduce the size of endometriotic lesions in rats, which is associated with a decreased microvessel density and VEGF expression of the ectopic endometrial tissue. Consistent with the fact that curcumin has been consumed as a dietary supplement for centuries and is considered pharmacologically safe (Wilken *et al.*, 2011), the treated animals did not show any signs of side effects during the 4-week treatment period.

Puerarin is derived from the Chinese medical herb *Radix puerariae* and belongs to the group of phytoestrogens, which exhibit a structure similar to 17 $\beta$ -estradiol (Hwang and Jeong, 2008). Besides estrogenic activity, phytoestrogens can also have anti-estrogenic effects (Zhao and Mu, 2011), which makes them attractive for the treatment of endometriosis. Accordingly, puerarin inhibits estrogen-stimulated vascularization of human endometriotic tissue in the CAM assay by down-regulation of MMP-9, intercellular adhesion molecule-1 and VEGF expression (Wang *et al.*, 2011). In contrast, genistein, another phytoestrogen isolated from soy products, only delays the angiogenic process during the initial establishment of endometriotic lesions in dorsal skinfold chambers, but does not affect the final vascularization of the lesions (Laschke *et al.*, 2010).

HBA is the pharmacological active component of *Gastrodia elata* Blume, which is used as a traditional herbal medicine for the treatment of headache, tetanus and epilepsy owing to its analgesic, sedative and anti-convulsant effects (Hsieh *et al.*, 2000; Yu *et al.*, 2005). Recently, HBA has been shown to inhibit *in vivo* vascularization of endometriotic lesions, which were induced by endometrial tissue transplantation into mouse dorsal skinfold chambers (Laschke *et al.*, 2011c). Additional *in vitro* experiments revealed that this may be related to the inhibition of multiple steps of the angiogenic process, including expression of angiogenic growth factors and MMPs, endothelial cell proliferation and migration as well as vascular sprouting (Laschke *et al.*, 2011c).

Xanthohumol is a prenylated flavonoid isolated from hops, which acts as a pleiotropic cancer chemopreventive agent (Gerhauser *et al.*, 2002). Rudzitis-Auth *et al.* (2012) found that treatment with this compound effectively inhibits the vascularization and growth of endometriotic lesions, which are surgically induced in the peritoneal cavity of BALB/c mice. Detailed immunohistochemical analyses showed that this is associated with a reduced proliferating activity of the microvascular endothelium in xanthohumol-treated lesions, whereas xanthohumol does not induce apoptotic death of endothelial cells. Moreover, this type of treatment does not affect proliferation and vascularization within the female reproductive organs (Rudzitis-Auth *et al.*, 2012).

Taken together, these studies indicate that several phytochemical compounds may be suitable for the anti-angiogenic treatment of endometriosis. However, for this purpose most of these compounds would have to be administered in doses which cannot be achieved by simple dietary consumption because of their low concentrations in medicinal herbs and their poor bioavailability. This problem may be overcome by high-dose supplementation therapy because of recent progress in the stereo-selective total synthesis of specific compounds, as already described for EGCG (Nagle *et al.*, 2006). Another problem is the lack of clinical evidence for the efficacy of natural medicinal herbs or synthetic phytochemical drugs in the treatment of endometriosis. Thus, there is a strong need for controlled clinical studies, which have to analyse the interaction of these compounds with other drugs and potential side effects in patients with endometriosis.

## Immunomodulators

During the last decades, numerous studies have shown that abnormalities in the immune system play an important role in the aetiology and pathogenesis of endometriosis, as previously reviewed in detail (Paul Dmowski and Braun, 2004). Accordingly, immunomodulatory agents have been suggested for the treatment of the disease. In line with the fact that there is a close link between inflammation and angiogenesis (Fiedler and Augustin, 2006), some of these agents have been described to exert specific anti-angiogenic effects on endometriotic lesions. These include lipoxin A4 (LXA4; Xu *et al.*, 2012), rapamycin (Laschke *et al.*, 2006b) and pentoxifylline (Vlahos *et al.*, 2010).

LXA4 is an endogenous eicosanoid, which is involved in the regulation of various inflammatory processes (Romano, 2010). Moreover, it has been shown *in vitro* and *in vivo* to inhibit VEGF-stimulated endothelial proliferation and angiogenesis (Baker *et al.*, 2009; Hao *et al.*, 2011). Of interest, both the endometrium in experimental endometriosis in rats and the tissues from patients with endometriosis show a higher expression of LXA4 receptor when compared with normal tissues (Motohashi *et al.*, 2005). For these reasons, Xu *et al.* (2012) recently analysed for the first time the effect of LXA4 on angiogenesis in mouse endometriotic lesions. They found that treatment with LXA4 inhibits the activity of MMP-9 and decreases mRNA levels of VEGF in endometriotic lesions, resulting in a significant growth suppression and atrophy of their glands. However, the treatment does not alter serum estradiol and progesterone levels or disrupt estrus cycling.

Rapamycin (Sirolimus) is a mammalian target of rapamycin inhibitor, which is widely used as an immunosuppressive drug to prevent rejection in organ transplantation (Buhaescu *et al.*, 2006). Of interest, rapamycin in immunosuppressive doses has also been demonstrated to inhibit tumour angiogenesis by decreasing VEGF production (Guba *et al.*, 2002). Based on these results, the effect of rapamycin on endometriotic lesions was analysed in the dorsal skinfold chamber model (Laschke *et al.*, 2006b). Daily treatment of the lesions with 1.5 mg/kg rapamycin induced their regression, which was associated with an inhibition of VEGF-mediated angiogenesis. In addition, rapamycin suppressed the proliferation of endometrial and endothelial cells. Thus, rapamycin also represents an effective inhibitor of angiogenesis in ectopic endometrial tissue. Nonetheless, owing to its immunosuppressive effect and risk profile it is questionable whether this compound will make its way into clinical endometriosis therapy (Buhaescu *et al.*, 2006).

In contrast, pentoxifylline has already been tested in clinical trials as a potential drug for patients with endometriosis (Kamencic and Thiel, 2008; Lu *et al.*, 2012). Pentoxifylline is a pleiotropic immunomodulating agent, which influences both the production of inflammatory mediators, such as tumour necrosis factor- $\alpha$ , and the responsiveness of immunocompetent cells to inflammatory stimuli (Olive *et al.*, 2004). Recently, Vlahos *et al.* (2010) reported that pentoxifylline exerts an anti-angiogenic effect on developing endometriotic lesions in rats by suppressing VEGF-C and Flk-1 expression. Several other experimental studies demonstrated the regression of endometriotic lesions under pentoxifylline treatment (Nothnick *et al.*, 1994; Mohammadzadeh *et al.*, 2008). A major advantage of this drug is the fact that it does not inhibit ovulation and, thus, can be administered throughout the time period of attempting conception (Olive *et al.*, 2004). Moreover, pentoxifylline is well tolerated with only minor side effects, such as gastric discomfort and dizziness (Olive *et al.*, 2004). However, at the time of writing there is still not enough clinical evidence to support the use of pentoxifylline in the management of premenopausal women with endometriosis in terms of subfertility and relief of pain outcomes (Lu *et al.*, 2012).

### Dopamine agonists

A decade ago, Basu *et al.* (2001) made the interesting discovery that the neurotransmitter dopamine selectively inhibits the vascular permeabilizing and angiogenic activity of VEGF at non-toxic levels, revealing a new link between the nervous system and angiogenesis. This led to the idea to use dopamine agonists for anti-angiogenic therapy. In gynaecology, dopamine agonists, such as cabergoline, are currently used for the suppression of breast-feeding and treatment of hyperprolactinaemia (Gillam *et al.*, 2006; Colao *et al.*, 2007; Buhendwa *et al.*, 2008). Importantly, cabergoline treatment during pregnancy does not increase the risk of spontaneous miscarriage, premature delivery or congenital abnormalities (Robert *et al.*, 1996; Ricci *et al.*, 2002).

Based on these reports, the Pellicer research group analysed the effect of cabergoline on growth and vascularization of endometriotic lesions in the nude mouse model (Novella-Maestre *et al.*, 2009). They found that daily oral treatment with cabergoline over 14 days causes the regression of endometriotic lesions by suppression of cell proliferation and VEGF-mediated angiogenesis. They could further demonstrate that cabergoline treatment results in a significantly lower expression of VEGF and VEGFR-2 in endometriotic lesions (Novella-Maestre *et al.*, 2010). Thus, they concluded that dopamine agonists may be successful in the treatment of peritoneal endometriosis. However, chronic cabergoline treatment is known to be associated with an increased incidence of cardiac valve regurgitation (Schade *et al.*, 2007). Therefore, in an additional study they compared the efficacy of the non-ergot-derived dopamine agonist quinagolide with that of cabergoline in inhibiting angiogenesis and vascularization of endometriotic lesions (Delgado-Rosas *et al.*, 2011). Because both compounds were equally effective, they decided to perform a clinical pilot study with quinagolide in hyperprolactinemic patients with endometriosis, who required a first surgical intervention and underwent a second-look laparoscopy (Gómez *et al.*, 2011). Of interest, treatment with the dopamine agonist quinagolide induced a 70% reduction of endometriotic lesions, with 35% of lesions vanishing completely. Further histological analyses revealed that this was associated with a

down-regulation of VEGF/VEGFR-2, pro-angiogenic cytokines and plasminogen activator inhibitor-1 within the lesions. These highly promising results and the beneficial side effect profile of quinagolide suggest that this compound should now be tested in larger clinical multicenter trials for its applicability in patients with endometriosis.

### Peroxisome proliferator-activated receptor agonists

Peroxisome proliferator-activated receptors (PPARs) are ligand-activated transcription factors, which comprise three subtypes, i.e. PPAR- $\alpha$ , PPAR- $\gamma$  and PPAR- $\beta/\delta$  (Tyagi *et al.*, 2011). These nuclear receptors have a major regulatory function in energy homeostasis, metabolic processes and inflammation (Tyagi *et al.*, 2011). Activation of PPAR- $\alpha$  reduces triglyceride levels and activation of PPAR- $\beta/\delta$  enhances fatty acid metabolism and modulates the development of atherosclerosis. In contrast, PPAR- $\gamma$  activation mediates insulin sensitization and enhances glucose metabolism. Accordingly, effective PPAR agonists have been developed for the treatment of hypertriglyceridemia and type 2 diabetes mellitus in the form of fibrates and thiazolidinediones (Lalloyer and Staels, 2010). Some of these drugs have been shown to inhibit the development of new blood vessels, and, thus, may be useful for the treatment of angiogenic diseases (Biscetti *et al.*, 2009).

Onalan *et al.* (2009) demonstrated for the first time in a rat model that treatment with the PPAR- $\alpha$  agonist fenofibrate causes regression of endometriotic lesions, which is associated with reduced VEGF levels in the peritoneal fluid. These results are rather surprising considering the fact that the peritoneal fluid of patients with endometriosis contains activators of PPAR- $\alpha$  that stimulate macrophage chemotaxis (Hornung *et al.*, 2001). Peritoneal macrophages, in turn, are a major source of VEGF in endometriosis (McLaren *et al.*, 1996). Thus, these contradictory findings indicate that further experimental studies are needed to clarify the exact role of PPAR- $\alpha$  in the pathogenesis of endometriosis and to identify potential applications of PPAR- $\alpha$  agonists in the treatment of the disease.

In contrast, the effects of PPAR- $\gamma$  agonists on endometriosis have already been extensively analysed under experimental conditions during the last few years. Several rodent studies reported the regression of endometriotic lesions treated with a PPAR- $\gamma$  agonist (Lebovic *et al.*, 2004; Demirturk *et al.*, 2006; Aytan *et al.*, 2007; Olivares *et al.*, 2011). In addition, Lebovic *et al.* (2007) demonstrated in the baboon endometriosis model that the size and overall number of endometriotic lesions is significantly reduced in animals treated with rosiglitazone and pioglitazone (Lebovic *et al.*, 2010) when compared with placebo-treated controls. These results may be caused by the pleiotropic action of PPAR- $\gamma$  agonists on multiple cellular mechanisms. In fact, Kavoussi *et al.* (2009) found that activation of PPAR- $\gamma$  inhibits the attachment of endometrial cells to peritoneal cells. Moreover, PPAR- $\gamma$  agonists have been shown to suppress VEGF expression in endometrial cells (Peeters *et al.*, 2005) and to reduce the microvessel density in developing endometriotic lesions (Herington *et al.*, 2011).

Taken together, these findings indicate that PPAR- $\gamma$  agonists are promising drugs for the treatment of endometriosis. Accordingly, Moravek *et al.* (2009) published a first case series of three women with endometriosis, who were recruited as part of a prospective clinical trial and treated with rosiglitazone for 6 months. They found that

rosiglitazone was well tolerated by the patients and reduced endometriosis-induced pain in two patients, while one patient experienced no change. However, this clinical trial was not continued because rosiglitazone was shown to cause an increased risk of cardiovascular side effects (Nissen and Wolski, 2007). Meanwhile, pioglitazone has also been restricted in several countries, because the FDA warned that it may cause cancer in the urinary bladder (Balakumar and Kathuria, 2012). These examples clearly show that a major challenge for the establishment of PPAR- $\gamma$  agonists in future endometriosis therapy is the identification of drugs with an acceptable side-effect profile.

## Progestins, danazol and GnRH agonists

Progestins, danazol and GnRH agonists are drugs which are already widely used for endometriosis therapy because they reduce pain symptoms and effectively induce the regression of endometriotic lesions (Rodgers and Falcone, 2008). Noteworthy, several studies reported that these drugs also exert anti-angiogenic effects besides their well-known anti-hormonal activity.

Dienogest, an orally active progestin with a favourable safety and tolerability profile, has been shown to inhibit both embryonic and tumour cell-induced angiogenesis (Nakamura *et al.*, 1999). In line with these findings, Katayama *et al.* (2010) demonstrated in the rat dorsal skinfold chamber model that dienogest treatment suppresses vascularization of developing endometriotic lesions, as indicated by a decreased microvessel density and blood perfusion when compared with controls. Moreover, dienogest-treated lesions exhibit a reduced number of microvessels which stain positive for  $\alpha$ -smooth muscle actin. Thus, dienogest seems to inhibit both the development and maturation of new blood vessels in endometriotic lesions, which may contribute to its proven clinical efficacy in endometriosis treatment.

Mönckedieck *et al.* (2009) investigated the effect of progesterone, dydrogesterone and its metabolite dihydrodydrogesterone on parameters of extracellular matrix degradation and angiogenesis involved in the development of endometriotic lesions in mice. Of interest, they found that these progestins suppress the transcription of angiogenic growth factors, including bFGF, VEGF-A and Cyr61, and of MMPs to a different degree. Such differences may be used in the future to identify those progestins, or progestin combinations, which are most effective in the treatment of endometriosis.

Matalliotakis *et al.* (2003) analysed the soluble levels of different growth factors and cytokines in the serum of patients with endometriosis and healthy women. They could demonstrate that patients with endometriosis exhibited significantly higher serum levels of VEGF when compared with controls. A 6-month treatment with the synthetic testosterone derivative danazol reduced these levels to a normal threshold.

Finally, Khan *et al.* (2010) analysed biopsy specimens from patients with endometriosis, adenomyosis and uterine myoma, who were treated for a variable period of 3–6 months with the GnRH agonist leuprolide acetate. They could show that GnRH agonist treatment decreases macrophage infiltration and microvessel density of endometriotic lesions, which is associated with an increased apoptotic cell death. Further studies now have to clarify whether these observations are related to the direct effect of leuprolide acetate on inflammation and angiogenesis at the tissue level or the indirect effect of

hypoestrogenism. In fact, estrogen has been shown to increase VEGF mRNA expression in endometrial cells (Shifren *et al.*, 1996), which seems to be directly mediated by estrogen response sequences in the VEGF gene (Hyder *et al.*, 2000).

## Other agents

In addition to the above listed groups of different compounds, some agents have been shown in individual reports to exert anti-angiogenic effects in endometriosis. These include anginex (Nap *et al.*, 2004, 2005), romidepsin (Imesch *et al.*, 2011), quinalizarin (Feng *et al.*, 2012) and the immunoconjugate molecule Icon (Krikun *et al.*, 2010).

Anginex is a synthetic  $\beta$ -sheet-forming peptide, which has been designed to mimic  $\beta$ -sheet domains of several anti-angiogenic agents, such as platelet factor-4, interleukin-8 and bactericidal-permeability increasing protein-1 (Griffioen *et al.*, 2001). Accordingly, anginex inhibits endothelial cell proliferation, adhesion and migration and induces apoptosis in these cells (Griffioen *et al.*, 2001). In the context of endometriosis, anginex has been demonstrated to suppress the formation of endometriotic lesions in the CAM assay and to reduce the number of established lesions in the peritoneal cavity of nude mice (Nap *et al.*, 2004, 2005). However, anginex has not yet been tested in clinical studies and, thus, is not well characterized in terms of potential side effects in humans.

Romidepsin belongs to the group of histone deacetylase (HDAC) inhibitors, which influence gene expression by enhancing acetylation of histones in specific chromatin domains (Emanuele *et al.*, 2008). HDAC inhibitors are suggested to be promising drugs for tumour therapy because they exert potent anti-cancer activities, including the inhibition of angiogenesis (Emanuele *et al.*, 2008). In a recent study, romidepsin has been shown to suppress the transcription, expression and secretion of VEGF in human epithelial endometriotic cells (Imesch *et al.*, 2011). This first report indicates that HDAC inhibitors may also play a role in the future anti-angiogenic treatment of endometriosis.

Quinalizarin is a selective inhibitor of protein kinase CK2, which is a serine/threonine kinase regulating a wide variety of biological processes, including angiogenesis (Kramerov *et al.*, 2008). Of interest, all three subunits of CK2 ( $\alpha$ ,  $\alpha'$  and  $\beta$ ) are expressed in the stroma and glands of endometrial tissue and their activity is significantly reduced by quinalizarin (Feng *et al.*, 2012). In line with these findings, Feng *et al.* (2012) could demonstrate in the mouse dorsal skinfold chamber model of endometriosis that quinalizarin inhibits the vascularization of endometriotic lesions, which is associated with their regression. However, although the animals tolerated the daily treatment with quinalizarin well in this study, it is currently unknown which side effects on which different organ systems may be induced by targeting CK2.

Using an athymic mouse model of endometriosis, Krikun *et al.* (2010) demonstrated the anomalous expression of a tissue factor by endothelial cells in endometriotic lesions. Of interest, treatment with the immunoconjugate molecule Icon, which binds with high affinity and specificity to this aberrant tissue factor, largely destroyed endometriotic lesions by vascular disruption. Importantly, the treatment with Icon did not interfere with subsequent fertility nor did it have any teratogenic effects. Therefore, the authors concluded that Icon may be an ideal drug for women of reproductive age who are suffering from endometriosis and who desire subsequent fertility.

## Potential impact of anti-angiogenic treatment in future endometriosis therapy

Numerous compounds have been analysed during the last years in terms of their anti-angiogenic activity in endometriosis. Typically, these compounds originally have been described as potential candidates for anti-angiogenic cancer therapy but many of their mechanisms of action are transferable to the treatment of endometriotic lesions. However, although cancer and endometriosis are similar in that they are crucially dependent on angiogenesis, the safety requirements for an anti-angiogenic therapy differ completely between the two entities. In fact, endometriosis is not a potentially life-threatening disease, unlike cancer. Moreover, most of the affected patients are young women in reproductive age, who desire to have children. Considering the fact that physiological angiogenesis is a major prerequisite for reproductive function (Reynolds *et al.*, 1992), anti-angiogenic compounds have to target specifically angiogenesis in endometriotic lesions or, at least, should not exert long-term side effects on blood vessel development within the ovary and uterus after stopping treatment. Accordingly, one of the major challenges in the future establishment of anti-angiogenic therapies is the detailed experimental and clinical evaluation of their potential side effects in young women and their risk of teratogenicity in case of pregnancy. Moreover, because an anti-angiogenic therapy carries a high risk of impairing fertility, it may primarily be used to treat patients suffering from severe pain associated with endometriosis. For this purpose, promising candidates for therapy are, in particular, those anti-angiogenic compounds which have a favourable risk profile and have already been clinically approved for the safe treatment of other benign diseases.

Furthermore, it should be considered that the development of new blood vessels in endometriotic lesions is not solely driven by one angiogenic growth factor but is most probably mediated by various angiogenic signalling pathways (Laschke *et al.*, 2006a). This means that specific blockade of an individual factor may be compensated by redundant activity or up-regulation of other factors. To overcome this problem, the use of pleiotropic compounds, which target simultaneously different mechanisms of blood vessel development, may be appropriate. Nonetheless, because of the heterogeneity of endometriosis it is not likely that the application of any single anti-angiogenic agent will be sufficient to cure the disease. In fact, anti-angiogenic approaches typically induce the regression of a newly formed immature microvasculature but are not able to destroy mature pericyte-covered blood vessels (Benjamin *et al.*, 1999; Nap *et al.*, 2004). Therefore, rectovaginal endometriotic lesions, which are mainly composed of fibromuscular tissue with mature microvessels (Itoga *et al.*, 2003), may be resistant to anti-angiogenic therapy. On the other hand, anti-angiogenic compounds may effectively inhibit the establishment of new endometriotic lesions with strong angiogenic activity in early stages of the disease or after surgical treatment. Thus, they could gain major importance in the prevention or progression of endometriosis, contributing to a significant reduction in the high recurrence rates associated with the presently applied pharmacological and surgical treatment strategies. Moreover, the application of anti-angiogenic compounds in combination with other well-established drugs may be important in

the development of novel therapeutic regimens for endometriosis, with fewer side effects and increased efficacy.

## Conclusions

Angiogenesis represents an integral part in the pathogenesis of endometriosis and various anti-angiogenic agents have been proved in experimental studies to induce the regression of endometriotic lesions by targeting their blood supply. However, clinical evidence for the efficacy of anti-angiogenic treatment strategies in endometriosis is still lacking. Thus, there is an urgent need for controlled clinical trials to transfer the herein reported experimental findings from bench to bedside. For this purpose, anti-angiogenic compounds have to be identified, which exhibit an acceptable spectrum of side effects without affecting fertility or pregnancy in young women. If this succeeds, anti-angiogenic treatment strategies hold great promise as an important component of future endometriosis therapy.

## Authors' roles

M.W.L. designed the study, identified the articles, drafted and revised the manuscript. M.D.M. designed the study and revised the manuscript. Both authors approved the final version of the manuscript.

## Funding

There was no funding of this study.

## Conflict of interest

None.

## References

- Aytan H, Caliskan AC, Demirturk F, Aytan P, Koseoglu DR. Peroxisome proliferator-activated receptor-gamma agonist rosiglitazone reduces the size of experimental endometriosis in the rat model. *Aust N Z J Obstet Gynaecol* 2007; **47**:321–325.
- Baker N, O'Meara SJ, Scannell M, Maderna P, Godson C. Lipoxin A4: anti-inflammatory and anti-angiogenic impact on endothelial cells. *J Immunol* 2009; **182**:3819–3826.
- Balakumar P, Kathuria S. Submaximal PPAR $\gamma$  activation and endothelial dysfunction: new perspectives for the management of cardiovascular disorders. *Br J Pharmacol* 2012, in press. doi:10.1111/j.1476-381.2012.01938.x.
- Barlier A, Jaquet P. Quinagolide—a valuable treatment option for hyperprolactinaemia. *Eur J Endocrinol* 2006; **154**:187–195.
- Basu S, Nagy JA, Pal S, Vasile E, Eckelhoefer IA, Bliss VS, Manseau EJ, Dasgupta PS, Dvorak HF, Mukhopadhyay D. The neurotransmitter dopamine inhibits angiogenesis induced by vascular permeability factor/vascular endothelial growth factor. *Nat Med* 2001; **7**:569–574.
- Becker RC. COX-2 inhibitors. *Tex Heart Inst J* 2005; **32**:380–383.
- Becker CM, D'Amato RJ. Angiogenesis and antiangiogenic therapy in endometriosis. *Microvasc Res* 2007; **74**:121–130.
- Becker CM, Sampson DA, Rupnick MA, Rohan RM, Efstathiou JA, Short SM, Taylor GA, Folkman J, D'Amato RJ. Endostatin inhibits the growth of endometriotic lesions but does not affect fertility. *Fertil Steril* 2005; **84**(Suppl 2):1144–1155.
- Becker CM, Sampson DA, Short SM, Javaherian K, Folkman J, D'Amato RJ. Short synthetic endostatin peptides inhibit endothelial migration in vitro and endometriosis in a mouse model. *Fertil Steril* 2006a; **85**:71–77.



- Becker CM, Wright RD, Satchi-Fainaro R, Funakoshi T, Folkman J, Kung AL, D'Amato RJ. A novel noninvasive model of endometriosis for monitoring the efficacy of antiangiogenic therapy. *Am J Pathol* 2006b; **168**:2074–2084.
- Becker CM, Rohwer N, Funakoshi T, Cramer T, Bernhardt W, Birsner A, Folkman J, D'Amato RJ. 2-methoxyestradiol inhibits hypoxia-inducible factor-1[alpha] and suppresses growth of lesions in a mouse model of endometriosis. *Am J Pathol* 2008; **172**:534–544.
- Becker CM, Beaudry P, Funakoshi T, Benny O, Zaslavsky A, Zurakowski D, Folkman J, D'Amato RJ, Ryeom S. Circulating endothelial progenitor cells are up-regulated in a mouse model of endometriosis. *Am J Pathol* 2011; **178**:1782–1791.
- Beerepoot LV, Witteveen EO, Groenewegen G, Fogler WE, Sim BK, Sidor C, Zonnenberg BA, Schramel F, Gebbink MF, Voest EE. Recombinant human angiostatin by twice-daily subcutaneous injection in advanced cancer: a pharmacokinetic and long-term safety study. *Clin Cancer Res* 2003; **9**:4025–4033.
- Benjamin LE, Golijanin D, Itin A, Pode D, Keshet E. Selective ablation of immature blood vessels in established human tumors follows vascular endothelial growth factor withdrawal. *J Clin Invest* 1999; **103**:159–165.
- Benny O, Fainaru O, Adini A, Cassiola F, Bazinet L, Adini I, Pravda E, Nahmias Y, Koirala S, Corfas G et al. An orally delivered small-molecule formulation with antiangiogenic and anticancer activity. *Nat Biotechnol* 2008; **26**:799–807.
- Bhargava P, Marshall JL, Rizvi N, Dahut W, Yoe J, Figuera M, Phipps K, Ong VS, Kato A, Hawkins MJ. A Phase I and pharmacokinetic study of TNP-470 administered weekly to patients with advanced cancer. *Clin Cancer Res* 1999; **5**:1989–1995.
- Biscetti F, Straface G, Pitocco D, Zaccardi F, Ghirlanda G, Flex A. Peroxisome proliferator-activated receptors and angiogenesis. *Nutr Metab Cardiovasc Dis* 2009; **19**:751–759.
- Bouhlef MA, Staels B, Chinetti-Gbaguidi G. Peroxisome proliferator-activated receptors—from active regulators of macrophage biology to pharmacological targets in the treatment of cardiovascular disease. *J Intern Med* 2008; **263**:28–42.
- Brautbar A, Ballantyne CM. Pharmacological strategies for lowering LDL cholesterol: statins and beyond. *Nat Rev Cardiol* 2011; **8**:253–265.
- Bruner-Tran KL, Osteen KG, Duleba AJ. Simvastatin protects against the development of endometriosis in a nude mouse model. *J Clin Endocrinol Metab* 2009; **94**:2489–2494.
- Buhaescu I, Izzedine H, Covic A. Sirolimus—challenging current perspectives. *Ther Drug Monit* 2006; **28**:577–584.
- Buhendwa L, Zachariah R, Teck R, Massaquoi M, Kazima J, Firmenich P, Harries AD. Cabergoline for suppression of puerperal lactation in a prevention of mother-to-child HIV-transmission programme in rural Malawi. *Trop Doct* 2008; **38**:30–32.
- Bulletti C, Coccia ME, Battistoni S, Borini A. Endometriosis and infertility. *J Assist Reprod Genet* 2010; **27**:441–447.
- Cakmak H, Basar M, Seval-Celik Y, Osteen KG, Duleba AJ, Taylor HS, Lockwood CJ, Arici A. Statins Inhibit Monocyte Chemotactic Protein 1 Expression in Endometriosis. *Reprod Sci* 2012, in press.
- Canavan TP, Radosh L. Managing endometriosis. Strategies to minimize pain and damage. *Postgrad Med* 2000; **107**:213–216.
- Carmeliet P, Jain RK. Molecular mechanisms and clinical applications of angiogenesis. *Nature* 2011; **473**:298–307.
- Ceyhan ST, Onguru O, Baser I, Gunhan O. Expression of cyclooxygenase-2 and vascular endothelial growth factor in ovarian endometriotic cysts and their relationship with angiogenesis. *Fertil Steril* 2008; **90**:988–993.
- Chen D, Wan SB, Yang H, Yuan J, Chan TH, Dou QP. EGCG, green tea polyphenols and their synthetic analogs and prodrugs for human cancer prevention and treatment. *Adv Clin Chem* 2011; **53**:155–177.
- Cho S, Park SH, Choi YS, Seo SK, Kim HY, Park KH, Cho DJ, Lee BS. Expression of cyclooxygenase-2 in eutopic endometrium and ovarian endometriotic tissue in women with severe endometriosis. *Gynecol Obstet Invest* 2010; **69**:93–100.
- Chow HH, Cai Y, Hakim IA, Crowell JA, Shahi F, Brooks CA, Dorr RT, Hara Y, Alberts DS. Pharmacokinetics and safety of green tea polyphenols after multiple-dose administration of epigallocatechin gallate and polyphenon E in healthy individuals. *Clin Cancer Res* 2003; **9**:3312–3319.
- Chung HW, Wen Y, Choi EA, Hao-Li, Moon HS, Yu HK, Polan ML. Pleiotrophin (PTN) and midkine (MK) mRNA expression in eutopic and ectopic endometrium in advanced stage endometriosis. *Mol Hum Reprod* 2002; **8**:350–355.
- Cobellis L, Razzi S, De Simone S, Sartini A, Fava A, Danero S, Giofrè W, Mazzini M, Petraglia F. The treatment with a COX-2 specific inhibitor is effective in the management of pain related to endometriosis. *Eur J Obstet Gynecol Reprod Biol* 2004; **116**:100–102.
- Coiffier B, Pro B, Prince HM, Foss F, Sokol L, Greenwood M, Caballero D, Borchmann P, Morschhauser F, Wilhelm M et al. Results from a pivotal, open-label, phase II study of romidepsin in relapsed or refractory peripheral T-cell lymphoma after prior systemic therapy. *J Clin Oncol* 2012; **30**:631–636.
- Colao A, Di Sarno A, Guerra E, Pivonello R, Cappabianca P, Caranci F, Elefante A, Cavallo LM, Briganti F, Cirillo S et al. Predictors of remission of hyperprolactinaemia after long-term withdrawal of cabergoline therapy. *Clin Endocrinol (Oxf)* 2007; **67**:426–433.
- Cox H, Henderson L, Wood R, Cagliarini G. Learning to take charge: women's experiences of living with endometriosis. *Complement Ther Nurs Midwifery* 2003; **9**:62–68.
- Dabrosin C, Gyorffy S, Margetts P, Ross C, Gaudie J. Therapeutic effect of angiostatin gene transfer in a murine model of endometriosis. *Am J Pathol* 2002; **161**:909–918.
- Dahut WL, Lakhani NJ, Gulley JL, Arlen PM, Kohn EC, Kotz H, McNally D, Parr A, Nguyen D, Yang SX et al. Phase I clinical trial of oral 2-methoxyestradiol, an antiangiogenic and apoptotic agent, in patients with solid tumors. *Cancer Biol Ther* 2006; **5**:22–27.
- Delgado-Rosas F, Gómez R, Ferrero H, Gaytan F, Garcia-Velasco J, Simón C, Pellicer A. The effects of ergot and non-ergot-derived dopamine agonists in an experimental mouse model of endometriosis. *Reproduction* 2011; **142**:745–755.
- Demirturk F, Aytan H, Caliskan AC, Aytan P, Koseoglu DR. Effect of peroxisome proliferator-activated receptor-gamma agonist rosiglitazone on the induction of endometriosis in an experimental rat model. *J Soc Gynecol Investig* 2006; **13**:58–62.
- Descamps E, Petrault-Laprais M, Maurois P, Pages N, Bac P, Bordet R, Vamecq J. Experimental stroke protection induced by 4-hydroxybenzyl alcohol is cancelled by bacitracin. *Neurosci Res* 2009; **64**:137–142.
- de Vries C, Escobedo JA, Ueno H, Houck K, Ferrara N, Williams LT. The fms-like tyrosine kinase, a receptor for vascular endothelial growth factor. *Science* 1992; **255**:989–991.
- Dhanabal M, Ramchandran R, Waterman MJ, Lu H, Knebelmann B, Segal M, Sukhatme VP. Endostatin induces endothelial cell apoptosis. *J Biol Chem* 1999a; **274**:11721–11726.
- Dhanabal M, Ramchandran R, Volk R, Stillman IE, Lombardo M, Iruela-Arispe ML, Simons M, Sukhatme VP. Endostatin: yeast production, mutants, and antitumor effect in renal cell carcinoma. *Cancer Res* 1999b; **59**:189–197.
- Dings RP, Yokoyama Y, Ramakrishnan S, Griffioen AW, Mayo KH. The designed angiostatic peptide anginex synergistically improves chemotherapy and antiangiogenesis therapy with angiostatin. *Cancer Res* 2003; **63**:382–385.
- Dogan E, Saygılı U, Posaci C, Tuna B, Caliskan S, Altunyurt S, Saatli B. Regression of endometrial explants in rats treated with the cyclooxygenase-2 inhibitor rofecoxib. *Fertil Steril* 2004; **82**(Suppl 3):1115–1120.
- Donnez J, Smoes P, Gillerot S, Casanas-Roux F, Nisolle M. Vascular endothelial growth factor (VEGF) in endometriosis. *Hum Reprod* 1998; **13**:1686–1690.
- Dorn C, Bataille F, Gaebele E, Heilmann J, Hellerbrand C. Xanthohumol feeding does not impair organ function and homeostasis in mice. *Food Chem Toxicol* 2010; **48**:1890–1897.
- Dulak J, Józkwicz A. Anti-angiogenic and anti-inflammatory effects of statins: relevance to anti-cancer therapy. *Curr Cancer Drug Targets* 2005; **5**:579–594.
- Ebert AD, Bartley J, David M. Aromatase inhibitors and cyclooxygenase-2 (COX-2) inhibitors in endometriosis: new questions—old answers? *Eur J Obstet Gynecol Reprod Biol* 2005; **122**:144–150.
- Eder JP Jr, Supko JG, Clark JW, Puchalski TA, Garcia-Carbonero R, Ryan DP, Shulman LN, Proper J, Kirvan M, Rattner B et al. Phase I clinical trial of recombinant human endostatin administered as a short intravenous infusion repeated daily. *J Clin Oncol* 2002; **20**:3772–3784.
- Emanuele S, Lauricella M, Tesoriere G. Histone deacetylase inhibitors: apoptotic effects and clinical implications (Review). *Int J Oncol* 2008; **33**:637–646.
- Esfandiari N, Khazaei M, Ai J, Bielecki R, Gottlieb L, Ryan E, Casper RF. Effect of a statin on an in vitro model of endometriosis. *Fertil Steril* 2007; **87**:257–262.
- Fedele L, Bianchi S, Di Nola G, Candiani M, Busacca M, Vignali M. The recurrence of endometriosis. *Ann N Y Acad Sci* 1994; **734**:358–364.

- Feng D, Welker S, Körbel C, Rudzitis-Auth J, Menger MD, Montenarh M, Laschke MW. Protein kinase CK2 is a regulator of angiogenesis in endometriotic lesions. *Angiogenesis* 2012;**15**:243–252.
- Ferrara N, Hillan KJ, Novotny W, Bevacizumab (Avastin), a humanized anti-VEGF monoclonal antibody for cancer therapy. *Biochem Biophys Res Commun* 2005;**333**:328–335.
- Fiedler U, Augustin HG. Angiopoietins: a link between angiogenesis and inflammation. *Trends Immunol* 2006;**27**:552–558.
- FitzGerald GA, Patrono C. The coxibs, selective inhibitors of cyclooxygenase-2. *N Engl J Med* 2001;**345**:433–442.
- Folkman J. Tumor angiogenesis: therapeutic implications. *N Engl J Med* 1971;**285**:1182–1186.
- Folkman J. Fighting cancer by attacking its blood supply. *Sci Am* 1996;**275**:150–154.
- Folkman J. Antiangiogenesis in cancer therapy - endostatin and its mechanisms of action. *Exp Cell Res* 2006;**312**:594–607.
- Fury MG, Zahalsky A, Wong R, Venkatraman E, Lis E, Hann L, Aliff T, Gerald W, Fleisher M, Pfister DG. A Phase II study of SU5416 in patients with advanced or recurrent head and neck cancers. *Invest New Drugs* 2007;**25**:165–172.
- Galle PC. Clinical presentation and diagnosis of endometriosis. *Obstet Gynecol Clin North Am* 1989;**16**:29–42.
- Garrido N, Navarro J, García-Velasco J, Remohi J, Pellice A, Simón C. The endometrium versus embryonic quality in endometriosis-related infertility. *Hum Reprod Update* 2002;**8**:95–103.
- Gerhauer C, Alt A, Heiss E, Gamal-Eldeen A, Klimo K, Knauff J, Neumann I, Scherf HR, Frank N, Bartsch H *et al.* Cancer chemopreventive activity of Xanthohumol, a natural product derived from hop. *Mol Cancer Ther* 2002;**1**:959–969.
- Gillam MP, Molitch ME, Lombardi G, Colao A. Advances in the treatment of prolactinomas. *Endocr Rev* 2006;**27**:485–534.
- Gilmour JA, Huntington A, Wilson HV. The impact of endometriosis on work and social participation. *Int J Nurs Pract* 2008;**14**:443–448.
- Giudice LC, Kao LC. Endometriosis. *Lancet* 2004;**364**:1789–1799.
- Gomez R, Gonzalez-Izquierdo M, Zimmermann RC, Novella-Maestre E, Alonso-Muriel I, Sanchez-Criado J, Remohi J, Simon C, Pellicer A. Low-dose dopamine agonist administration blocks vascular endothelial growth factor (VEGF)-mediated vascular hyperpermeability without altering VEGF receptor 2-dependent luteal angiogenesis in a rat ovarian hyperstimulation model. *Endocrinology* 2006;**147**:5400–5411.
- Gómez R, Abad A, Delgado F, Tamarit S, Simón C, Pellicer A. Effects of hyperprolactinemia treatment with the dopamine agonist quinagolide on endometriotic lesions in patients with endometriosis-associated hyperprolactinemia. *Fertil Steril* 2011;**95**:882.e1–888.e1.
- Griffioen AV, van der Schaft DW, Barendsz-Janson AF, Cox A, Struijker Boudier HA, Hillen HF, Mayo KH. Anginex, a designed peptide that inhibits angiogenesis. *Biochem J* 2001;**354**:233–242.
- Groothuis PG, Nap AW, Winterhager E, Grümmer R. Vascular development in endometriosis. *Angiogenesis* 2005;**8**:147–156.
- Guba M, von Breitenbuch P, Steinbauer M, Koehl G, Flegel S, Hornung M, Bruns CJ, Zuelke C, Farkas S, Anthuber M *et al.* Rapamycin inhibits primary and metastatic tumor growth by antiangiogenesis: involvement of vascular endothelial growth factor. *Nat Med* 2002;**8**:128–135.
- Guida M, Bifulco G, Di Spiezio Sardo A, Scala M, Fernandez LM, Nappi C. Review of the safety, efficacy and patient acceptability of the combined dienogest/estradiol valerate contraceptive pill. *Int J Womens Health* 2010;**2**:279–290.
- Guo SW. Recurrence of endometriosis and its control. *Hum Reprod Update* 2009;**15**:441–461.
- Hao H, Liu M, Wu P, Cai L, Tang K, Yi P, Li Y, Chen Y, Ye D. Lipoxin A4 and its analog suppress hepatocellular carcinoma via remodeling tumor microenvironment. *Cancer Lett* 2011;**309**:85–94.
- Harris AL. Hypoxia—a key regulatory factor in tumour growth. *Nat Rev Cancer* 2002;**2**:38–47.
- Healy DL, Rogers PA, Hii L, Wingfield M. Angiogenesis: a new theory for endometriosis. *Hum Reprod Update* 1998;**4**:736–740.
- Herington JL, Crispens MA, Carvalho-Macedo AC, Camargos AF, Lebovic DI, Bruner-Tran KL, Osteen KG. Development and prevention of postsurgical adhesions in a chimeric mouse model of experimental endometriosis. *Fertil Steril* 2011;**95**:1295–1301.
- Hoekman K. SU6668, a multitargeted angiogenesis inhibitor. *Cancer J* 2001;**7**(Suppl 3):S134–S138.
- Horn LC, Hentschel B, Meinel A, Alexander H, Leo C. Cyclooxygenase-2 expression, Ki-67 labeling index, and perifocal neovascularization in endometriotic lesions. *Ann Diagn Pathol* 2009;**13**:373–377.
- Hornung D, Waite LL, Ricke EA, Bentzien F, Wallwiener D, Taylor RN. Nuclear peroxisome proliferator-activated receptors alpha and gamma have opposing effects on monocyte chemotaxis in endometriosis. *J Clin Endocrinol Metab* 2001;**86**:3108–3114.
- Hsieh CL, Chang CH, Chiang SY, Li TC, Tang NY, Pon CZ, Hsieh CT, Lin JG. Anticonvulsive and free radical scavenging activities of vanillyl alcohol in ferric chloride-induced epileptic seizures in Sprague-Dawley rats. *Life Sci* 2000;**67**:1185–1195.
- Hull ML, Charnock-Jones DS, Chan CL, Bruner-Tran KL, Osteen KG, Tom BD, Fan TP, Smith SK. Antiangiogenic agents are effective inhibitors of endometriosis. *J Clin Endocrinol Metab* 2003;**88**:2889–2899.
- Hull ML, Prentice A, Wang DY, Butt RP, Phillips SC, Smith SK, Charnock-Jones DS. Nimesulide, a COX-2 inhibitor, does not reduce lesion size or number in a nude mouse model of endometriosis. *Hum Reprod* 2005;**20**:350–358.
- Hur SE, Lee JY, Moon HS, Chung HW. Angiopoietin-1, angiopoietin-2 and Tie-2 expression in eutopic endometrium in advanced endometriosis. *Mol Hum Reprod* 2006;**12**:421–426.
- Hwang YP, Jeong HG. Mechanism of phytoestrogen puerarin-mediated cytoprotection following oxidative injury: estrogen receptor-dependent up-regulation of PI3K/Akt and HO-1. *Toxicol Appl Pharmacol* 2008;**233**:371–381.
- Hyder SM, Nawaz Z, Chiappetta C, Stancel GM. Identification of functional estrogen response elements in the gene coding for the potent angiogenic factor vascular endothelial growth factor. *Cancer Res* 2000;**60**:3183–3190.
- Imesch P, Samartzis EP, Schneider M, Fink D, Fedier A. Inhibition of transcription, expression, and secretion of the vascular epithelial growth factor in human epithelial endometriotic cells by romidepsin. *Fertil Steril* 2011;**95**:1579–1583.
- Ingber D, Fujita T, Kishimoto S, Sudo K, Kanamaru T, Brem H, Folkman J. Synthetic analogues of fumagillin that inhibit angiogenesis and suppress tumour growth. *Nature* 1990;**348**:555–557.
- Itoga T, Matsumoto T, Takeuchi H, Yamasaki S, Sasahara N, Hoshi T, Kinoshita K. Fibrosis and smooth muscle metaplasia in rectovaginal endometriosis. *Pathol Int* 2003;**53**:371–375.
- Jefferson WN, Padilla-Banks E, Newbold RR. Disruption of the female reproductive system by the phytoestrogen genistein. *Reprod Toxicol* 2007;**23**:308–316.
- Jiang HQ, Li YL, Zou J. Effect of recombinant human endostatin on endometriosis in mice. *Chin Med J (Engl)* 2007;**120**:1241–1246.
- Kamba T, McDonald DM. Mechanisms of adverse effects of anti-VEGF therapy for cancer. *Br J Cancer* 2007;**96**:1788–1795.
- Kamencic H, Thiel JA. Pentoxifylline after conservative surgery for endometriosis: a randomized, controlled trial. *J Minim Invasive Gynecol* 2008;**15**:62–66.
- Katayama H, Katayama T, Uematsu K, Hiratsuka M, Kiyomura M, Shimizu Y, Sugita A, Ito M. Effect of dienogest administration on angiogenesis and hemodynamics in a rat endometrial autograft model. *Hum Reprod* 2010;**25**:2851–2858.
- Kavoussi SK, Witz CA, Binkley PA, Nair AS, Lebovic DI. Peroxisome-proliferator activator receptor-gamma activation decreases attachment of endometrial cells to peritoneal mesothelial cells in an in vitro model of the early endometriotic lesion. *Mol Hum Reprod* 2009;**15**:687–692.
- Keech A, Simes RJ, Barter P, Best J, Scott R, Taskinen MR, Forder P, Pillai A, Davis T, Glasziou P *et al.* Effects of long-term fenofibrate therapy on cardiovascular events in 9795 people with type 2 diabetes mellitus (the FIELD study): randomised controlled trial. *Lancet* 2005;**366**:1849–1861.
- Khan KN, Kitajima M, Hiraki K, Fujishita A, Sekine I, Ishimaru T, Masuzaki H. Changes in tissue inflammation, angiogenesis and apoptosis in endometriosis, adenomyosis and uterine myoma after GnRH agonist therapy. *Hum Reprod* 2010;**25**:642–653.
- Kim YM, Jang JW, Lee OH, Yeon J, Choi EY, Kim KW, Lee ST, Kwon YG. Endostatin inhibits endothelial and tumor cellular invasion by blocking the activation and catalytic activity of matrix metalloproteinase. *Cancer Res* 2000;**60**:5410–5413.
- Kim YM, Hwang S, Kim YM, Pyun BJ, Kim TY, Lee ST, Gho YS, Kwon YG. Endostatin blocks vascular endothelial growth factor-mediated signaling via direct interaction with KDR/Flk-1. *J Biol Chem* 2002;**277**:27872–27879.

- Klauber N, Rohan RM, Flynn E, D'Amato RJ. Critical components of the female reproductive pathway are suppressed by the angiogenesis inhibitor AGM-1470. *Nat Med* 1997;**3**:443–446.
- Kramerov AA, Saghizadeh M, Caballero S, Shaw LC, Li Calzi S, Bretner M, Montenarh M, Pinna LA, Grant MB, Ljubimov AV. Inhibition of protein kinase CK2 suppresses angiogenesis and hematopoietic stem cell recruitment to retinal neovascularization sites. *Mol Cell Biochem* 2008;**316**:177–186.
- Krikun G, Hu Z, Osteen K, Bruner-Tran KL, Schatz F, Taylor HS, Toti P, Arcuri F, Konigsberg W, Garen A *et al*. The immunoconjugate 'icon' targets aberrantly expressed endothelial tissue factor causing regression of endometriosis. *Am J Pathol* 2010;**176**:1050–1056.
- Kruger EA, Figg WD. TNP-470: an angiogenesis inhibitor in clinical development for cancer. *Expert Opin Investig Drugs* 2000;**9**:1383–1396.
- Kuenen BC, Giaccone G, Ruijter R, Kok A, Schalkwijk C, Hoekman K, Pinedo HM. Dose-finding study of the multitargeted tyrosine kinase inhibitor SU6668 in patients with advanced malignancies. *Clin Cancer Res* 2005;**11**:6240–6246.
- Kulke MH, Chan JA, Meyerhardt JA, Zhu AX, Abrams TA, Blaszkowsky LS, Regan E, Sidor C, Fuchs CS. A prospective phase II study of 2-methoxyestradiol administered in combination with bevacizumab in patients with metastatic carcinoid tumors. *Cancer Chemother Pharmacol* 2011;**68**:293–300.
- Lalloyer F, Staels B. Fibrates, glitazones, and peroxisome proliferator-activated receptors. *Arterioscler Thromb Vasc Biol* 2010;**30**:894–899.
- Laschke MW, Menger MD. In vitro and in vivo approaches to study angiogenesis in the pathophysiology and therapy of endometriosis. *Hum Reprod Update* 2007;**13**:331–342.
- Laschke MW, Elitzsch A, Vollmar B, Menger MD. In vivo analysis of angiogenesis in endometriosis-like lesions by intravital fluorescence microscopy. *Fertil Steril* 2005;**84**(Suppl 2):1199–1209.
- Laschke MW, Elitzsch A, Vollmar B, Vajkoczy P, Menger MD. Combined inhibition of vascular endothelial growth factor (VEGF), fibroblast growth factor and platelet-derived growth factor, but not inhibition of VEGF alone, effectively suppresses angiogenesis and vessel maturation in endometriotic lesions. *Hum Reprod* 2006a;**21**:262–268.
- Laschke MW, Elitzsch A, Scheuer C, Holstein JH, Vollmar B, Menger MD. Rapamycin induces regression of endometriotic lesions by inhibiting neovascularization and cell proliferation. *Br J Pharmacol* 2006b;**149**:137–144.
- Laschke MW, Elitzsch A, Scheuer C, Vollmar B, Menger MD. Selective cyclo-oxygenase-2 inhibition induces regression of autologous endometrial grafts by down-regulation of vascular endothelial growth factor-mediated angiogenesis and stimulation of caspase-3-dependent apoptosis. *Fertil Steril* 2007;**87**:163–171.
- Laschke MW, Schwender C, Scheuer C, Vollmar B, Menger MD. Epigallocatechin-3-gallate inhibits estrogen-induced activation of endometrial cells in vitro and causes regression of endometriotic lesions in vivo. *Hum Reprod* 2008;**23**:2308–2318.
- Laschke MW, Schwender C, Vollmar B, Menger MD. Genistein does not affect vascularization and blood perfusion of endometriotic lesions and ovarian follicles in dorsal skinfold chambers of Syrian golden hamsters. *Reprod Sci* 2010;**17**:568–577.
- Laschke MW, Giebels C, Nickels RM, Scheuer C, Menger MD. Endothelial progenitor cells contribute to the vascularization of endometriotic lesions. *Am J Pathol* 2011a;**178**:442–450.
- Laschke MW, Giebels C, Menger MD. Vasculogenesis: a new piece of the endometriosis puzzle. *Hum Reprod Update* 2011b;**17**:628–636.
- Laschke MW, Vorsterman van Oijen AE, Scheuer C, Menger MD. In vitro and in vivo evaluation of the anti-angiogenic actions of 4-hydroxybenzyl alcohol. *Br J Pharmacol* 2011c;**163**:835–844.
- Lazarus A, Keshet E. Vascular endothelial growth factor and vascular homeostasis. *Proc Am Thorac Soc* 2011;**8**:508–511.
- Lebovic DI, Kir M, Casey CL. Peroxisome proliferator-activated receptor-gamma induces regression of endometrial explants in a rat model of endometriosis. *Fertil Steril* 2004;**82**(Suppl 3):1008–1013.
- Lebovic DI, Mwenda JM, Chai DC, Mueller MD, Santi A, Fisseha S, D'Hooghe T. PPAR-gamma receptor ligand induces regression of endometrial explants in baboons: a prospective, randomized, placebo- and drug-controlled study. *Fertil Steril* 2007;**88**:1108–1119.
- Lebovic DI, Mwenda JM, Chai DC, Santi A, Xu X, D'Hooghe T. Peroxisome proliferator-activated receptor-(gamma) receptor ligand partially prevents the development of endometrial explants in baboons: a prospective, randomized, placebo-controlled study. *Endocrinology* 2010;**151**:1846–1852.
- Leung DW, Cachianes G, Kuang WJ, Goeddel DV, Ferrara N. Vascular endothelial growth factor is a secreted angiogenic mitogen. *Science* 1989;**246**:1306–1309.
- Lin J, Gu Y. Effect of monocyte chemoattractant protein-1 and estradiol on the secretion of vascular endothelial growth factor in endometrial stromal cells in vitro. *Fertil Steril* 2005;**84**:1793–1796.
- Liu CM, Ma JQ, Sun YZ. Puerarin protects rat kidney from lead-induced apoptosis by modulating the PI3K/Akt/eNOS pathway. *Toxicol Appl Pharmacol* 2012;**258**:330–342.
- Lu D, Song H, Li Y, Clarke J, Shi G. Pentoxifylline for endometriosis. *Cochrane Database Syst Rev* 2012;**1**:CD007677.
- Machado DE, Berardo PT, Landgraf RG, Fernandes PD, Palmero C, Alves LM, Abrao MS, Nasciutti LE. A selective cyclooxygenase-2 inhibitor suppresses the growth of endometriosis with an antiangiogenic effect in a rat model. *Fertil Steril* 2010;**93**:2674–2679.
- Mancini GB, Baker S, Bergeron J, Fitchett D, Frohlich J, Genest J, Gupta M, Hegele RA, Ng D, Pope J. Diagnosis, prevention, and management of statin adverse effects and intolerance: proceedings of a Canadian Working Group Consensus Conference. *Can J Cardiol* 2011;**27**:635–662.
- Matalliotakis IM, Goumenou AG, Koumantakis GE, Neonaki MA, Koumantakis EE, Dionysopoulou E, Athanassakis I, Vassiliadis S. Serum concentrations of growth factors in women with and without endometriosis: the action of anti-endometriosis medicines. *Int Immunopharmacol* 2003;**3**:81–89.
- Matsuzaki S, Canis M, Murakami T, Dechelotte P, Bruhat MA, Okamura K. Immunohistochemical analysis of the role of angiogenic status in the vasculature of peritoneal endometriosis. *Fertil Steril* 2001;**76**:712–716.
- Matsuzaki S, Canis M, Pouly JL, Wattiez A, Okamura K, Mage G. Cyclooxygenase-2 expression in deep endometriosis and matched eutopic endometrium. *Fertil Steril* 2004a;**82**:1309–1315.
- Matsuzaki S, Canis M, Darcha C, Dallel R, Okamura K, Mage G. Cyclooxygenase-2 selective inhibitor prevents implantation of eutopic endometrium to ectopic sites in rats. *Fertil Steril* 2004b;**82**:1609–1615.
- May K, Becker CM. Endometriosis and angiogenesis. *Minerva Ginecol* 2008;**60**:245–254.
- McLaren J. Vascular endothelial growth factor and endometriotic angiogenesis. *Hum Reprod Update* 2000;**6**:45–55.
- McLaren J, Prentice A, Charnock-Jones DS, Millican SA, Müller KH, Sharkey AM, Smith SK. Vascular endothelial growth factor is produced by peritoneal fluid macrophages in endometriosis and is regulated by ovarian steroids. *J Clin Invest* 1996;**98**:482–489.
- Mendel DB, Laird AD, Smolich BD, Blake RA, Liang C, Hannah AL, Shaheen RM, Ellis LM, Weitman S, Shawver LK *et al*. Development of SU5416, a selective small molecule inhibitor of VEGF receptor tyrosine kinase activity, as an anti-angiogenesis agent. *Anticancer Drug Des* 2000;**15**:29–41.
- Mereles D, Hunstein W. Epigallocatechin-3-gallate (EGCG) for Clinical Trials: More Pitfalls than Promises? *Int J Mol Sci* 2011;**12**:5592–5603.
- Millauer B, Witzigmann-Voos S, Schnürch H, Martinez R, Möller NP, Risau W, Ullrich A. High affinity VEGF binding and developmental expression suggest Flk-1 as a major regulator of vasculogenesis and angiogenesis. *Cell* 1993;**72**:835–846.
- Mohammadzadeh A, Heidari M, Soltanghorae H, Jeddi-Tehrani M, Ghaffari Novin M, Akhondi MM, Zeraati H, Mohammadzadeh F. Evaluation of the effect of pentoxifylline on white blood cell count in serum and peritoneal fluid in female rats with endometriosis. *J Obstet Gynaecol Res* 2008;**34**:307–313.
- Mönckedieck V, Sannecke C, Husen B, Kumbartski M, Kimmig R, Tötsch M, Winterhager E, Grümmer R. Progestins inhibit expression of MMPs and of angiogenic factors in human ectopic endometrial lesions in a mouse model. *Mol Hum Reprod* 2009;**15**:633–643.
- Moravek MB, Ward EA, Lebovic DI. Thiazolidinediones as therapy for endometriosis: a case series. *Gynecol Obstet Invest* 2009;**68**:167–170.
- Motohashi E, Kawauchi H, Endo H, Kondo H, Kitasato H, Kuramoto H, Majima M, Unno N, Hayashi I. Regulatory expression of lipoxin A4 receptor in physiologically estrus cycle and pathologically endometriosis. *Biomed Pharmacother* 2005;**59**:330–338.
- Nagle DG, Ferreira D, Zhou YD. Epigallocatechin-3-gallate (EGCG): chemical and biomedical perspectives. *Phytochemistry* 2006;**67**:1849–1855.

- Nahari D, Satchi-Fainaro R, Chen M, Mitchell I, Task LB, Liu Z, Kihneman J, Carroll AB, Terada LS, Nwariaku FE. Tumor cytotoxicity and endothelial Rac inhibition induced by TNP-470 in anaplastic thyroid cancer. *Mol Cancer Ther* 2007;**6**:1329–1337.
- Nakamura M, Katsuki Y, Shibutani Y, Oikawa T. Dienogest, a synthetic steroid, suppresses both embryonic and tumor-cell-induced angiogenesis. *Eur J Pharmacol* 1999;**386**:33–40.
- Nap AW, Griffioen AW, Dunselman GA, Bouma-Ter Steege JC, Thijssen VL, Evers JL, Groothuis PG. Antiangiogenesis therapy for endometriosis. *J Clin Endocrinol Metab* 2004;**89**:1089–1095.
- Nap AW, Dunselman GA, Griffioen AW, Mayo KH, Evers JL, Groothuis PG. Angiostatic agents prevent the development of endometriosis-like lesions in the chicken chorioallantoic membrane. *Fertil Steril* 2005;**83**:793–795.
- Nisolle M, Casanas-Roux F, Anaf V, Mine JM, Donnez J. Morphometric study of the stromal vascularization in peritoneal endometriosis. *Fertil Steril* 1993;**59**:681–684.
- Nissen SE, Woloski K. Effect of rosiglitazone on the risk of myocardial infarction and death from cardiovascular causes. *N Engl J Med* 2007;**356**:2457–2471.
- Nothnick WB. Endometriosis: in search of optimal treatment. *Minerva Ginecol* 2010;**62**:17–31.
- Nothnick WB, Curry TE, Vernon MW. Immunomodulation of rat endometriotic implant growth and protein production. *Am J Reprod Immunol* 1994;**31**:151–162.
- Novella-Maestre E, Carda C, Noguera I, Ruiz-Saurí A, García-Velasco JA, Simón C, Pellicer A. Dopamine agonist administration causes a reduction in endometrial implants through modulation of angiogenesis in experimentally induced endometriosis. *Hum Reprod* 2009;**24**:1025–1035.
- Novella-Maestre E, Carda C, Ruiz-Sauri A, Garcia-Velasco JA, Simon C, Pellicer A. Identification and quantification of dopamine receptor 2 in human eutopic and ectopic endometrium: a novel molecular target for endometriosis therapy. *Biol Reprod* 2010;**83**:866–873.
- Nussmeier NA, Whelton AA, Brown MT, Langford RM, Hoeft A, Parlow JL, Boyce SW, Verburg KM. Complications of the COX-2 inhibitors parecoxib and valdecoxib after cardiac surgery. *N Engl J Med* 2005;**352**:1081–1091.
- Nyberg P, Xie L, Kalluri R. Endogenous inhibitors of angiogenesis. *Cancer Res* 2005;**65**:3967–3979.
- Oktem M, Esinler I, Eroglu D, Haberal N, Bayraktar N, Zeyneloglu HB. High-dose atorvastatin causes regression of endometriotic implants: a rat model. *Hum Reprod* 2007;**22**:1474–1480.
- Olivares C, Ricci A, Bilotas M, Barañao RI, Meresman G. The inhibitory effect of celecoxib and rosiglitazone on experimental endometriosis. *Fertil Steril* 2011;**96**:428–433.
- Olive DL, Lindheim SR, Pritts EA. New medical treatments for endometriosis. *Best Pract Res Clin Obstet Gynaecol* 2004;**18**:319–328.
- Onalan G, Zeyneloglu HB, Bayraktar N. Fenofibrate causes regression of endometriotic implants: a rat model. *Fertil Steril* 2009;**92**:2100–2102.
- O'Reilly MS, Holmgren L, Shing Y, Chen C, Rosenthal RA, Moses M, Lane WS, Cao Y, Sage EH, Folkman J. Angiostatin: a novel angiogenesis inhibitor that mediates the suppression of metastases by a Lewis lung carcinoma. *Cell* 1994;**79**:315–328.
- O'Reilly MS, Boehm T, Shing Y, Fukai N, Vasios G, Lane WS, Flynn E, Birkhead JR, Olsen BR, Folkman J. Endostatin: an endogenous inhibitor of angiogenesis and tumor growth. *Cell* 1997;**88**:277–285.
- Ota H, Igarashi S, Sasaki M, Tanaka T. Distribution of cyclooxygenase-2 in eutopic and ectopic endometrium in endometriosis and adenomyosis. *Hum Reprod* 2001;**16**:561–566.
- Ozawa Y, Murakami T, Tamura M, Terada Y, Yaegashi N, Okamura K. A selective cyclooxygenase-2 inhibitor suppresses the growth of endometriosis xenografts via antiangiogenic activity in severe combined immunodeficiency mice. *Fertil Steril* 2006;**86**:1146–1151.
- Paul Dmowski W, Braun DP. Immunology of endometriosis. *Best Pract Res Clin Obstet Gynaecol* 2004;**18**:245–263.
- Peeters LL, Vigne JL, Tee MK, Zhao D, Waite LL, Taylor RN. PPAR gamma represses VEGF expression in human endometrial cells: implications for uterine angiogenesis. *Angiogenesis* 2005;**8**:373–379.
- Pullen N, Birch CL, Douglas GJ, Hussain Q, Pruimboom-Brees I, Walley RJ. The translational challenge in the development of new and effective therapies for endometriosis: a review of confidence from published preclinical efficacy studies. *Hum Reprod Update* 2011;**17**:791–802.
- Rein DT, Schmidt T, Bauerschmitz G, Hampl M, Beyer IM, Paupoo AA, Curiel DT, Breidenbach M. Treatment of endometriosis with a VEGF-targeted conditionally replicative adenovirus. *Fertil Steril* 2010;**93**:2687–2694.
- Reynolds LP, Killilea SD, Redmer DA. Angiogenesis in the female reproductive system. *FASEB J* 1992;**6**:886–892.
- Ribatti D. Endogenous inhibitors of angiogenesis: a historical review. *Leuk Res* 2009;**33**:638–644.
- Ricci E, Parazzini F, Motta T, Ferrari CI, Colao A, Clavenna A, Rocchi F, Gangi E, Paracchi S, Gasperi M et al. Pregnancy outcome after cabergoline treatment in early weeks of gestation. *Reprod Toxicol* 2002;**16**:791–793.
- Ricci AG, Olivares CN, Bilotas MA, Meresman GF, Barañao RI. Effect of vascular endothelial growth factor inhibition on endometrial implant development in a murine model of endometriosis. *Reprod Sci* 2011;**18**:614–622.
- Robert E, Musatti L, Piscitelli G, Ferrari CI. Pregnancy outcome after treatment with the ergot derivative, cabergoline. *Reprod Toxicol* 1996;**10**:333–337.
- Rodgers AK, Falcone T. Treatment strategies for endometriosis. *Expert Opin Pharmacother* 2008;**9**:243–255.
- Romano M. Lipoxin and aspirin-triggered lipoxins. *ScientificWorldJournal* 2010;**10**:1048–1064.
- Rudzitis-Auth J, Körbel C, Scheuer C, Menger MD, Laschke MW. Xanthohumol inhibits growth and vascularization of developing endometriotic lesions. *Hum Reprod* 2012;**27**:1735–1744.
- Satchi-Fainaro R, Puder M, Davies JW, Tran HT, Sampson DA, Greene AK, Corfas G, Folkman J. Targeting angiogenesis with a conjugate of HPMA copolymer and TNP-470. *Nat Med* 2004;**10**:255–261.
- Schade R, Andersohn F, Suissa S, Haverkamp W, Garbe E. Dopamine agonists and the risk of cardiac-valve regurgitation. *N Engl J Med* 2007;**356**:29–38.
- Schönthal AH. Direct non-cyclooxygenase-2 targets of celecoxib and their potential relevance for cancer therapy. *Br J Cancer* 2007;**97**:1465–1468.
- Shanmugam MK, Kannaiyan R, Sethi G. Targeting cell signaling and apoptotic pathways by dietary agents: role in the prevention and treatment of cancer. *Nutr Cancer* 2011;**63**:161–173.
- Sharkey AM, Day K, McPherson A, Malik S, Licence D, Smith SK, Charnock-Jones DS. Vascular endothelial growth factor expression in human endometrium is regulated by hypoxia. *J Clin Endocrinol Metab* 2000;**85**:402–409.
- Sharma I, Dhawan V, Mahajan N, Saha SC, Dhaliwal LK. In vitro effects of atorvastatin on lipopolysaccharide-induced gene expression in endometriotic stromal cells. *Fertil Steril* 2010;**94**:1639.e1–1646.e1.
- Shifren JL, Tseng JF, Zaloudek CJ, Ryan IP, Meng YG, Ferrara N, Jaffe RB, Taylor RN. Ovarian steroid regulation of vascular endothelial growth factor in the human endometrium: implications for angiogenesis during the menstrual cycle and in the pathogenesis of endometriosis. *J Clin Endocrinol Metab* 1996;**81**:3112–3118.
- Shweiki D, Itin A, Soffer D, Keshet E. Vascular endothelial growth factor induced by hypoxia may mediate hypoxia-initiated angiogenesis. *Nature* 1992;**359**:843–845.
- Sim BK, MacDonald NJ, Gubish ER. Angiostatin and endostatin: endogenous inhibitors of tumor growth. *Cancer Metastasis Rev* 2000;**19**:181–190.
- Simoons S, Hummelshoj L, D'Hooghe T. Endometriosis: cost estimates and methodological perspective. *Hum Reprod Update* 2007;**13**:395–404.
- Sin N, Meng L, Wang MQ, Wen JJ, Bormmann WG, Crews CM. The anti-angiogenic agent fumagillin covalently binds and inhibits the methionine aminopeptidase, MetAP-2. *Proc Natl Acad Sci USA* 1997;**94**:6099–6103.
- Sitruk-Ware R. New progestagens for contraceptive use. *Hum Reprod Update* 2006;**12**:169–178.
- Smith WL, Garavito RM, DeWitt DL. Prostaglandin endoperoxide H synthases (cyclooxygenases)-1 and -2. *J Biol Chem* 1996;**271**:33157–33160.
- Solomon SD, McMurray JJ, Pfeffer MA, Wittes J, Fowler R, Finn P, Anderson WF, Zuber A, Hawk E, Bertagnolli M et al. Cardiovascular risk associated with celecoxib in a clinical trial for colorectal adenoma prevention. *N Engl J Med* 2005;**352**:1071–1080.
- Stopper H, Schmitt E, Kobras K. Genotoxicity of phytoestrogens. *Mutat Res* 2005;**574**:139–155.
- Stratton P, Berkley KJ. Chronic pelvic pain and endometriosis: translational evidence of the relationship and implications. *Hum Reprod Update* 2011;**17**:327–346.
- Tan Y, Liu M, Wu B. Puerarin for acute ischaemic stroke. *Cochrane Database Syst Rev* 2008;CD004955.
- Taylor RN, Lebovic DI, Mueller MD. Angiogenic factors in endometriosis. *Ann N Y Acad Sci* 2002;**955**:89–100.

- Taylor RN, Yu J, Torres PB, Schickedanz AC, Park JK, Mueller MD, Sidell N. Mechanistic and therapeutic implications of angiogenesis in endometriosis. *Reprod Sci* 2009;**16**:140–146.
- Tolman KG. The safety of thiazolidinediones. *Expert Opin Drug Saf* 2011;**10**:419–428.
- Tyagi S, Gupta P, Saini AS, Kaushal C, Sharma S. The peroxisome proliferator-activated receptor: a family of nuclear receptors role in various diseases. *J Adv Pharm Technol Res* 2011;**2**:236–240.
- Van Langendonck A, Donnez J, Defrère S, Dunselman GA, Groothuis PG. Antiangiogenic and vascular-disrupting agents in endometriosis: pitfalls and promises. *Mol Hum Reprod* 2008;**14**:259–268.
- Verenich S, Gerk PM. Therapeutic promises of 2-methoxyestradiol and its drug disposition challenges. *Mol Pharm* 2010;**7**:2030–2039.
- Vlahos NF, Gregoriou O, Deliveliotou A, Perrea D, Vlachos A, Zhao Y, Lai J, Creatsas G. Effect of pentoxifylline on vascular endothelial growth factor C and flk-1 expression on endometrial implants in the rat endometriosis model. *Fertil Steril* 2010;**93**:1316–1323.
- Wahl ML, Kenan DJ, Gonzalez-Gronow M, Pizzo SV. Angiostatin's molecular mechanism: aspects of specificity and regulation elucidated. *J Cell Biochem* 2005;**96**:242–261.
- Wang D, Dubois RN. The role of COX-2 in intestinal inflammation and colorectal cancer. *Oncogene* 2010;**29**:781–788.
- Wang D, Liu Y, Han J, Zai D, Ji M, Cheng W, Xu L, Yang L, He M, Ni J et al. Puerarin suppresses invasion and vascularization of endometriosis tissue stimulated by 17 $\beta$ -estradiol. *PLoS One* 2011;**6**:e25011.
- Webster J, Piscitelli G, Polli A, D'Alborton A, Falsetti L, Ferrari C, Fioretti P, Giordano G, L'Hermite M, Ciccarelli E et al. Dose-dependent suppression of serum prolactin by cabergoline in hyperprolactinaemia: a placebo controlled, double blind, multicentre study. European Multicentre Cabergoline Dose-finding Study Group. *Clin Endocrinol (Oxf)* 1992;**37**:534–541.
- Wieser F, Cohen M, Gaeddert A, Yu J, Burks-Wicks C, Berga SL, Taylor RN. Evolution of medical treatment for endometriosis: back to the roots? *Hum Reprod Update* 2007;**13**:487–499.
- Wilken R, Veena MS, Wang MB, Srivatsan ES. Curcumin: a review of anti-cancer properties and therapeutic activity in head and neck squamous cell carcinoma. *Mol Cancer* 2011;**10**:12.
- Wilson AC, Meethal SV, Bowen RL, Atwood CS. Leuprolide acetate: a drug of diverse clinical applications. *Expert Opin Investig Drugs* 2007;**16**:1851–1863.
- Xu H, Lui WT, Chu CY, Ng PS, Wang CC, Rogers MS. Anti-angiogenic effects of green tea catechin on an experimental endometriosis mouse model. *Hum Reprod* 2009;**24**:608–618.
- Xu H, Becker CM, Lui WT, Chu CY, Davis TN, Kung AL, Birsner AE, D'Amato RJ, Wai Man GC, Wang CC. Green tea epigallocatechin-3-gallate inhibits angiogenesis and suppresses vascular endothelial growth factor C/vascular endothelial growth factor receptor 2 expression and signaling in experimental endometriosis in vivo. *Fertil Steril* 2011;**96**:1021–1028.
- Xu Z, Zhao F, Lin F, Chen J, Huang Y. Lipoxin A4 Inhibits the Development of Endometriosis in Mice: The Role of Anti-Inflammation and Anti-Angiogenesis. *Am J Reprod Immunol* 2012;**67**:491–497.
- Yang CS, Sang S, Lambert JD, Hou Z, Ju J, Lu G. Possible mechanisms of the cancer-preventive activities of green tea. *Mol Nutr Food Res* 2006;**50**:170–175.
- Yao L, Liu F, Hong L, Sun L, Liang S, Wu K, Fan D. The function and mechanism of COX-2 in angiogenesis of gastric cancer cells. *J Exp Clin Cancer Res* 2011;**30**:13.
- Yavuz E, Oktem M, Esinler I, Toru SA, Zeyneloglu HB. Genistein causes regression of endometriotic implants in the rat model. *Fertil Steril* 2007;**88**:1129–1134.
- Yu SJ, Kim JR, Lee CK, Han JE, Lee JH, Kim HS, Hong JH, Kang SG. Gastrodia elata blume and an active component, p-hydroxybenzyl alcohol reduce focal ischemic brain injury through antioxidant related gene expressions. *Biol Pharm Bull* 2005;**28**:1016–1020.
- Zhang Y, Cao H, Hu YY, Wang H, Zhang CJ. Inhibitory effect of curcumin on angiogenesis in ectopic endometrium of rats with experimental endometriosis. *Int J Mol Med* 2011;**27**:87–94.
- Zhao E, Mu Q. Phytoestrogen biological actions on Mammalian reproductive system and cancer growth. *Sci Pharm* 2011;**79**:1–20.
- Zhou H, Beevers CS, Huang S. The targets of curcumin. *Curr Drug Targets* 2011;**12**:332–347.
